# Supplementary material for: Dual inhibitors of epidermal growth factor receptor and topoisomerase IIα derived from a quinoline scaffold
Source: Royal Society of Chemistry journal article supplement (doi:10.1039/c6ra15118c), 2016-01-01

## **Dual inhibitors of epidermal growth factor receptor and topoisomerase**

### **II $\alpha$ derived from quinoline scaffold**

Monika Chauhan,<sup>a</sup> Gaurav Joshi,<sup>a</sup> Harveen Kler,<sup>a</sup> Archana Kashyap,<sup>a</sup> Suyog M. Amrutkar,<sup>b</sup> Uttam Chand Banerjee,<sup>b</sup> Praveen Sharma,<sup>c</sup> Sandeep Singh,<sup>c</sup> Raj Kumar<sup>\*a</sup>

### **Spectra of representative compounds**

# <sup>1</sup>H NMR

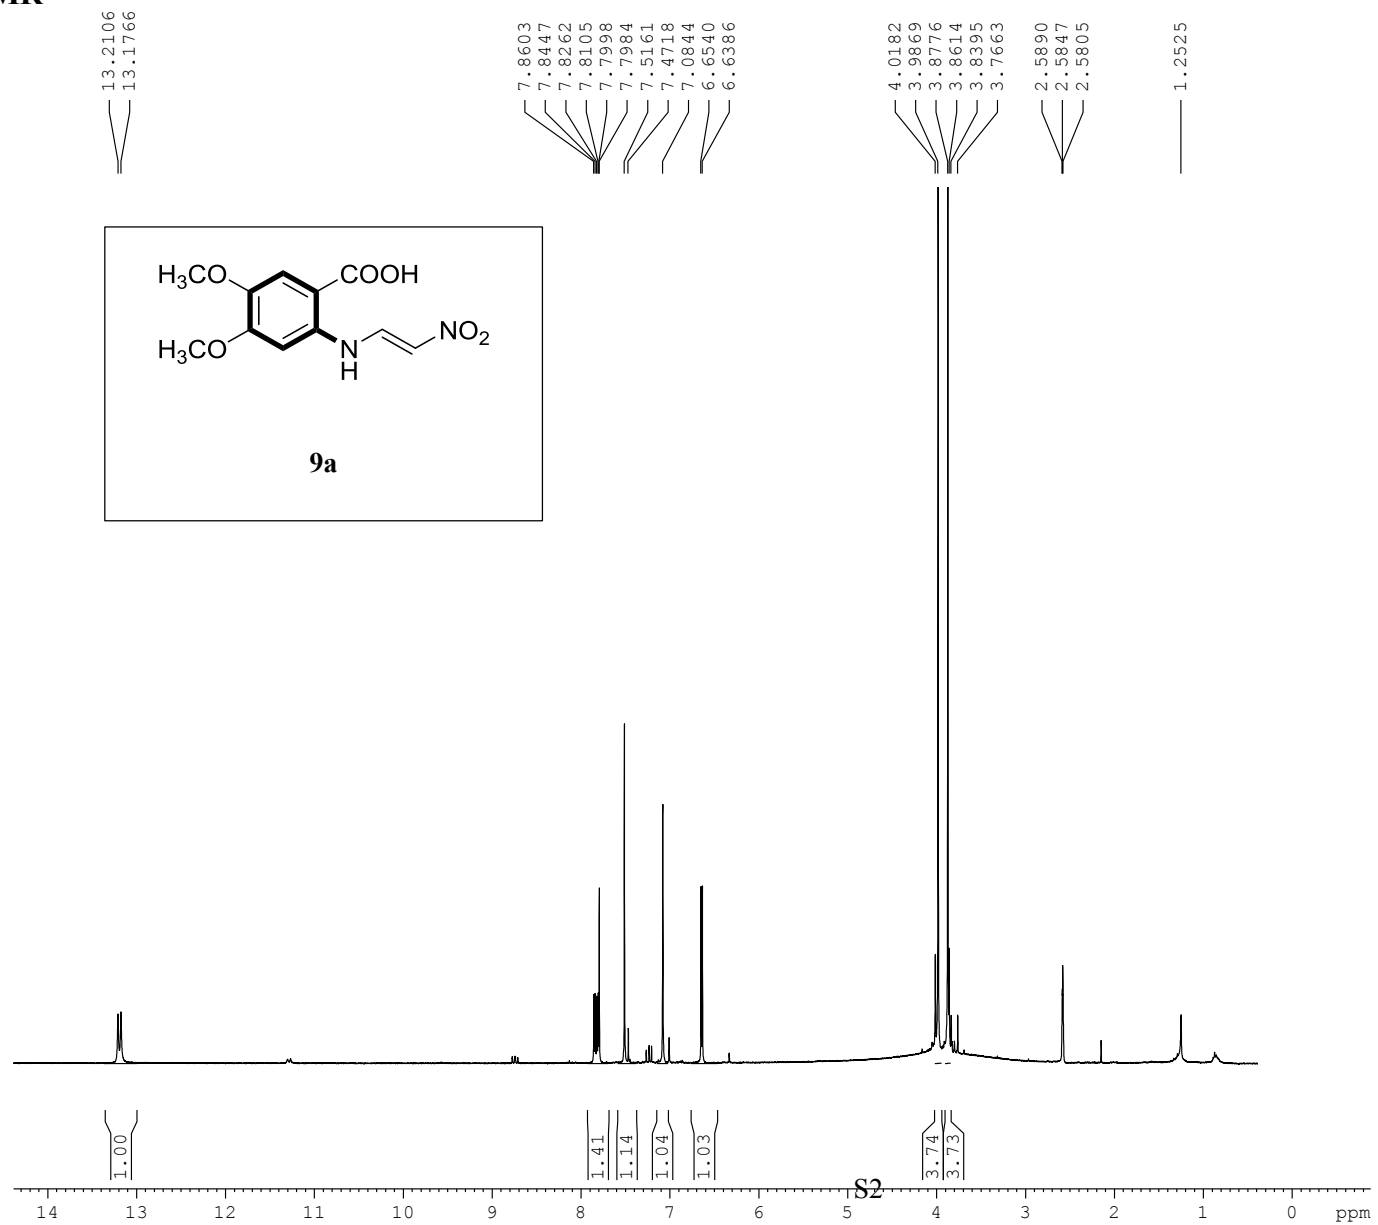

# <sup>13</sup>C NMR

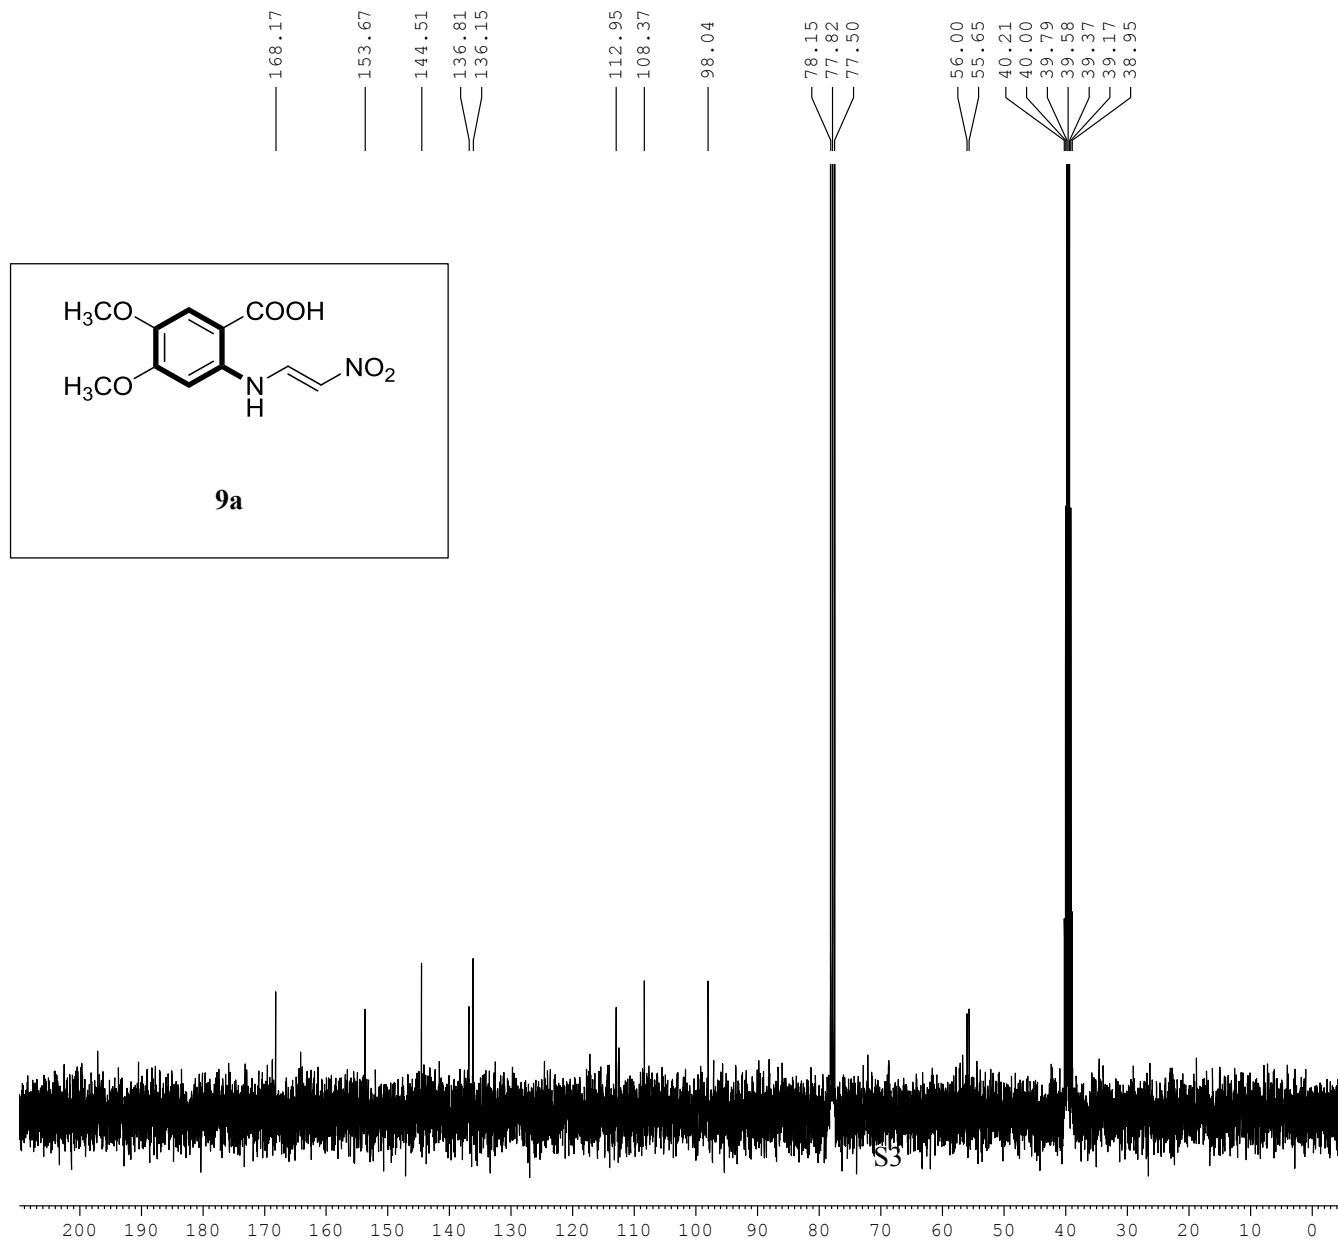

# <sup>1</sup>H NMR

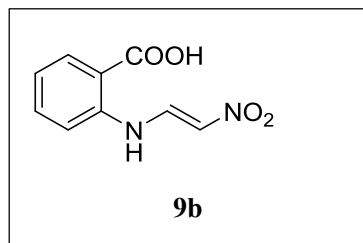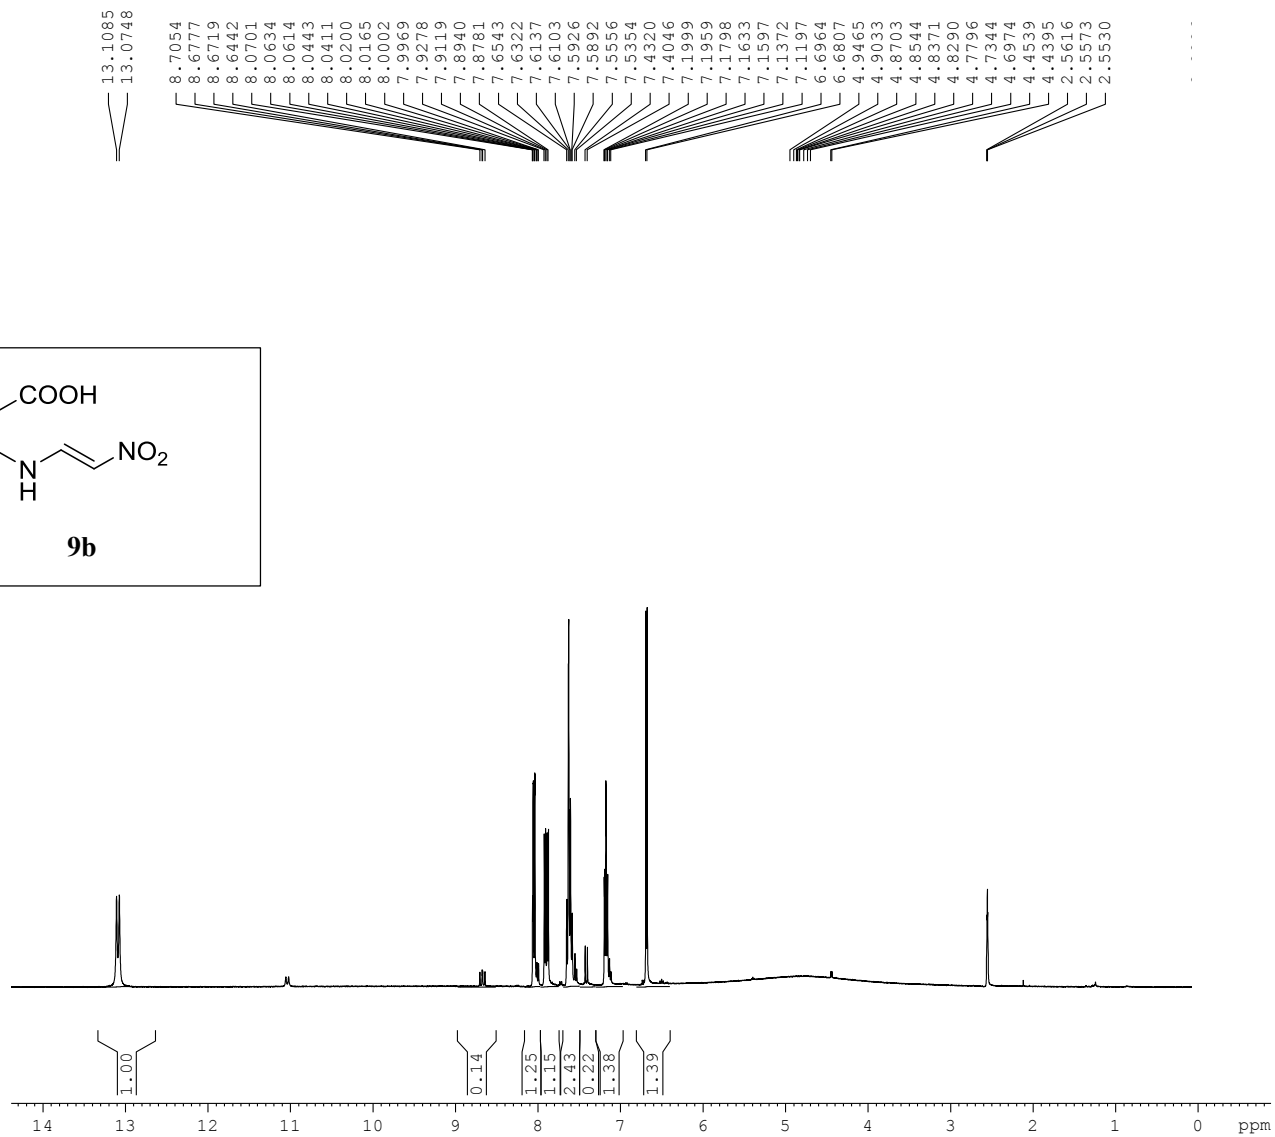

# <sup>13</sup>C NMR

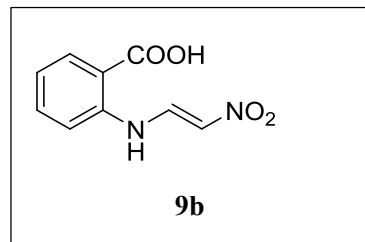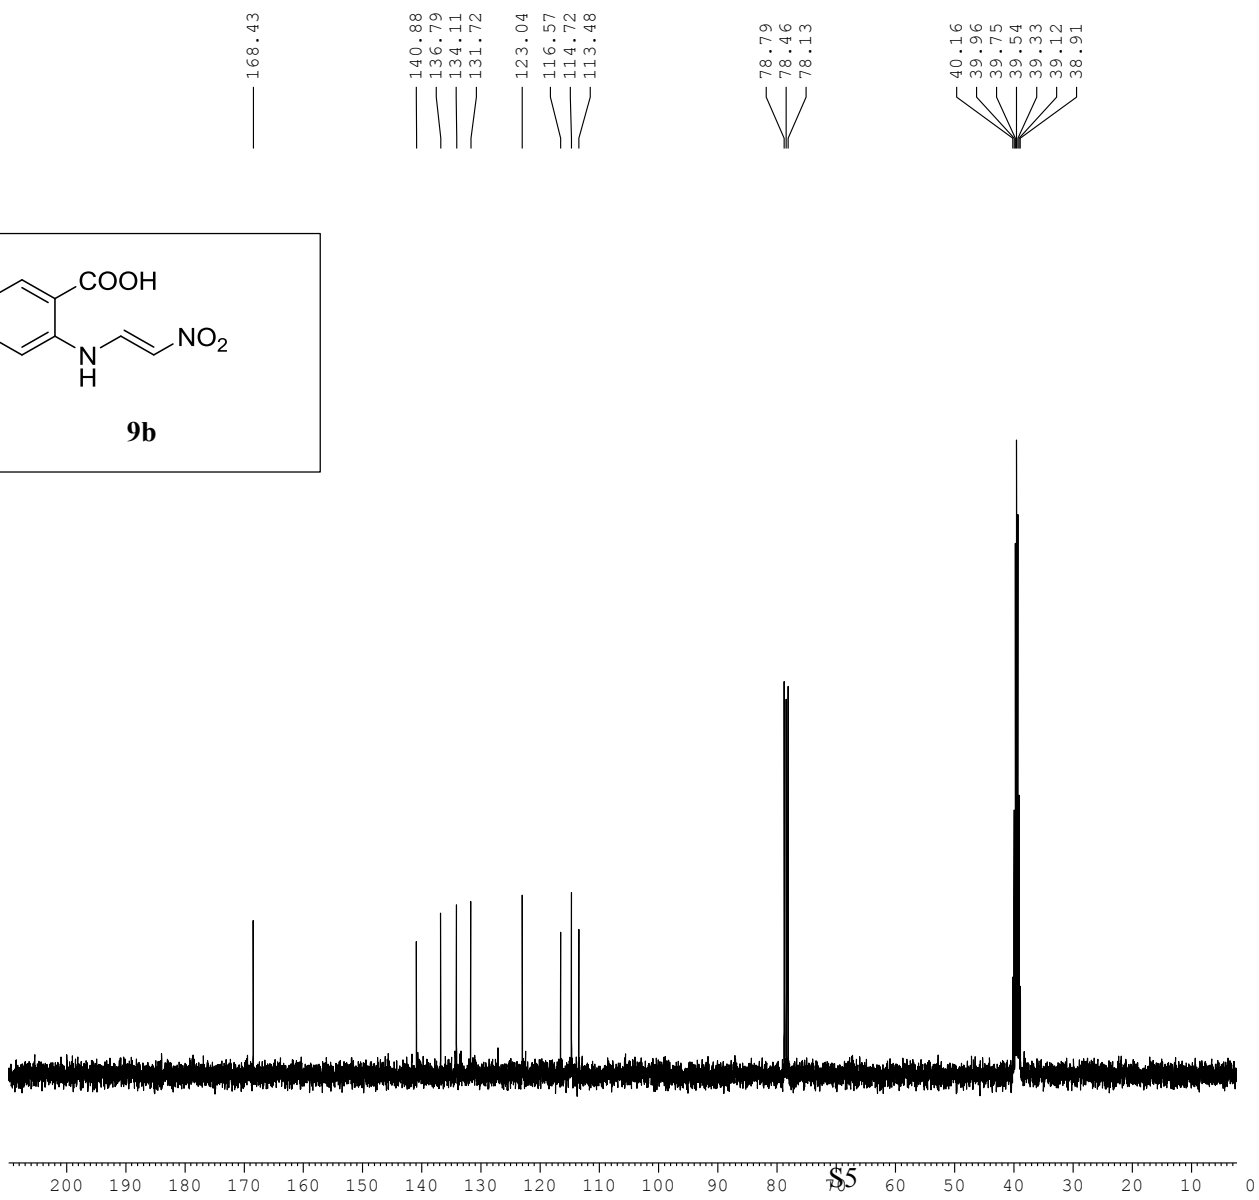

# <sup>1</sup>H NMR

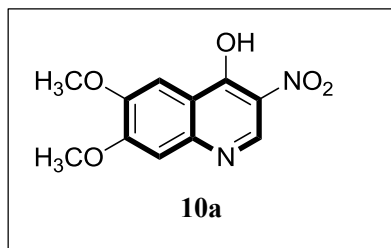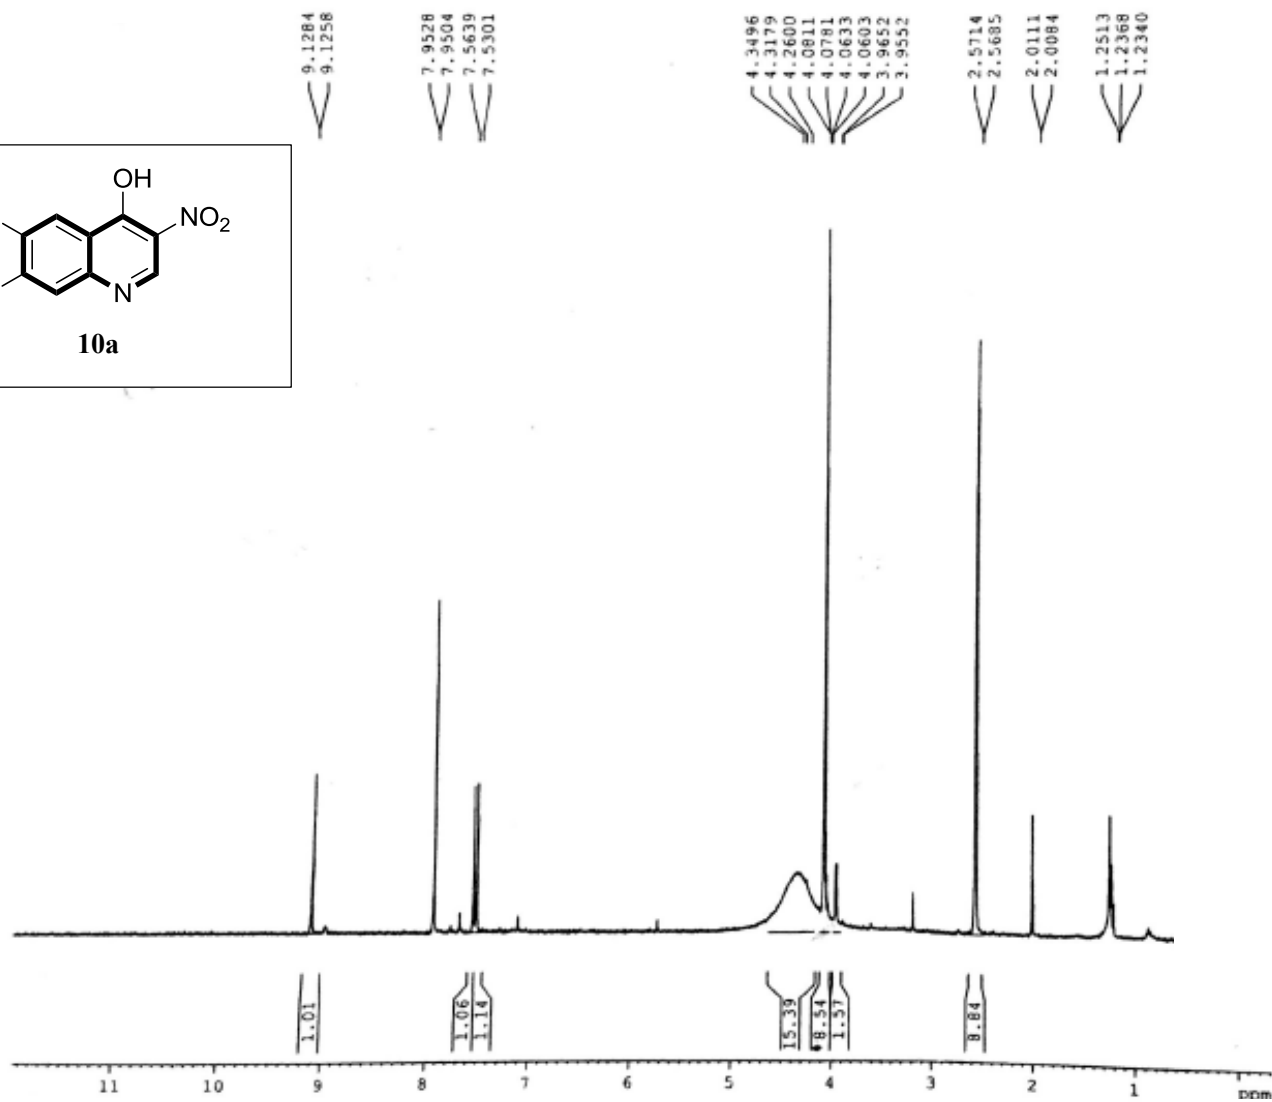

**<sup>1</sup>H NMR**

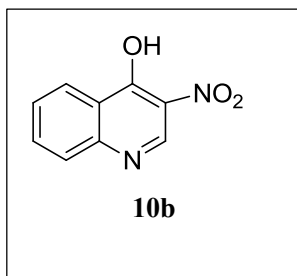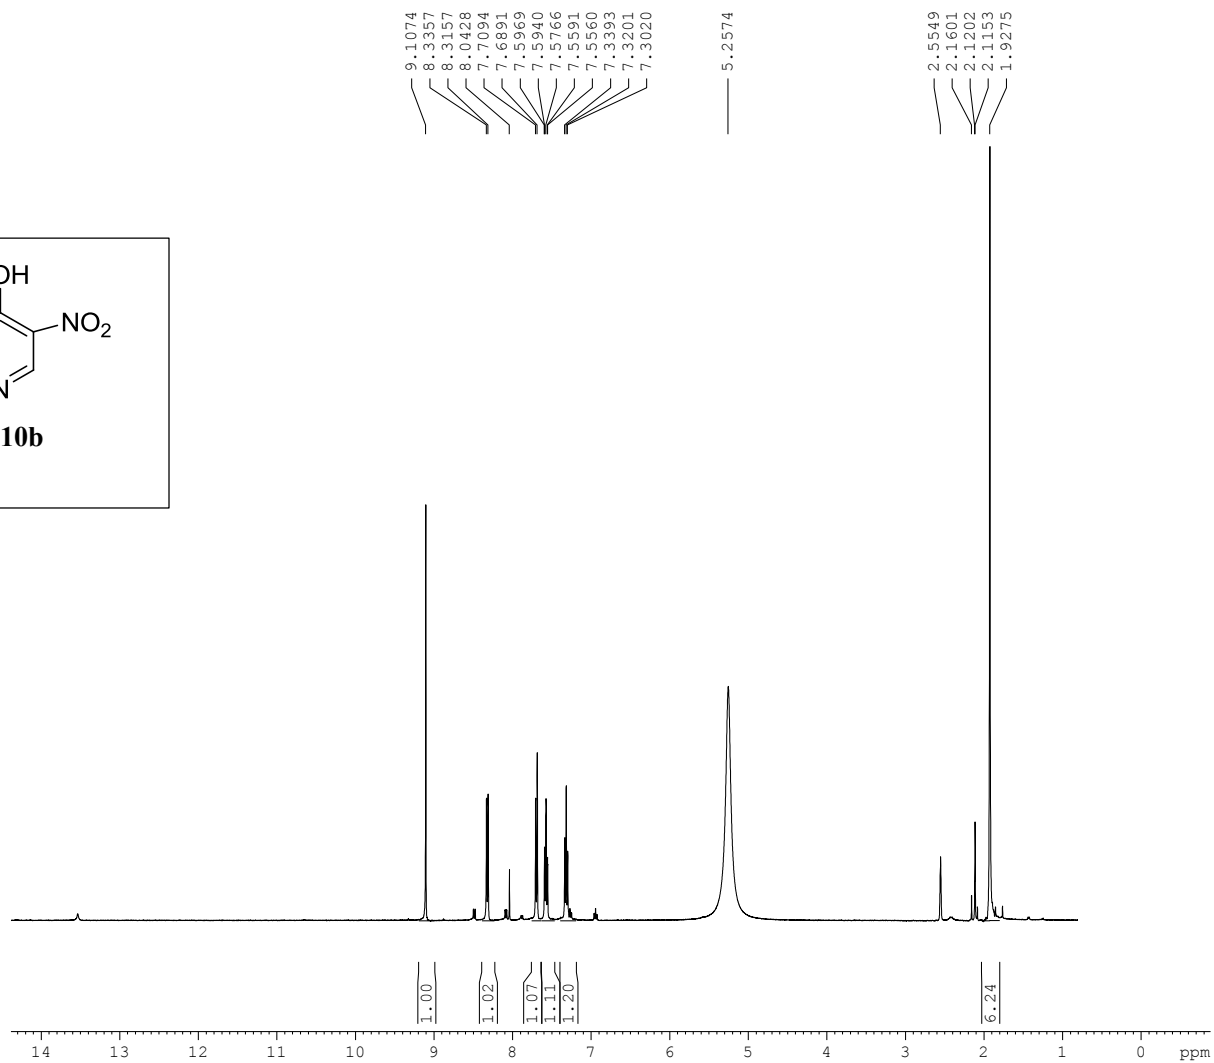

# <sup>13</sup>C NMR

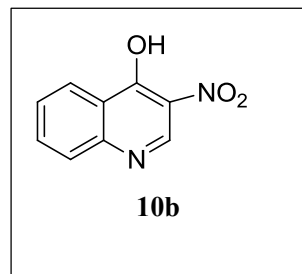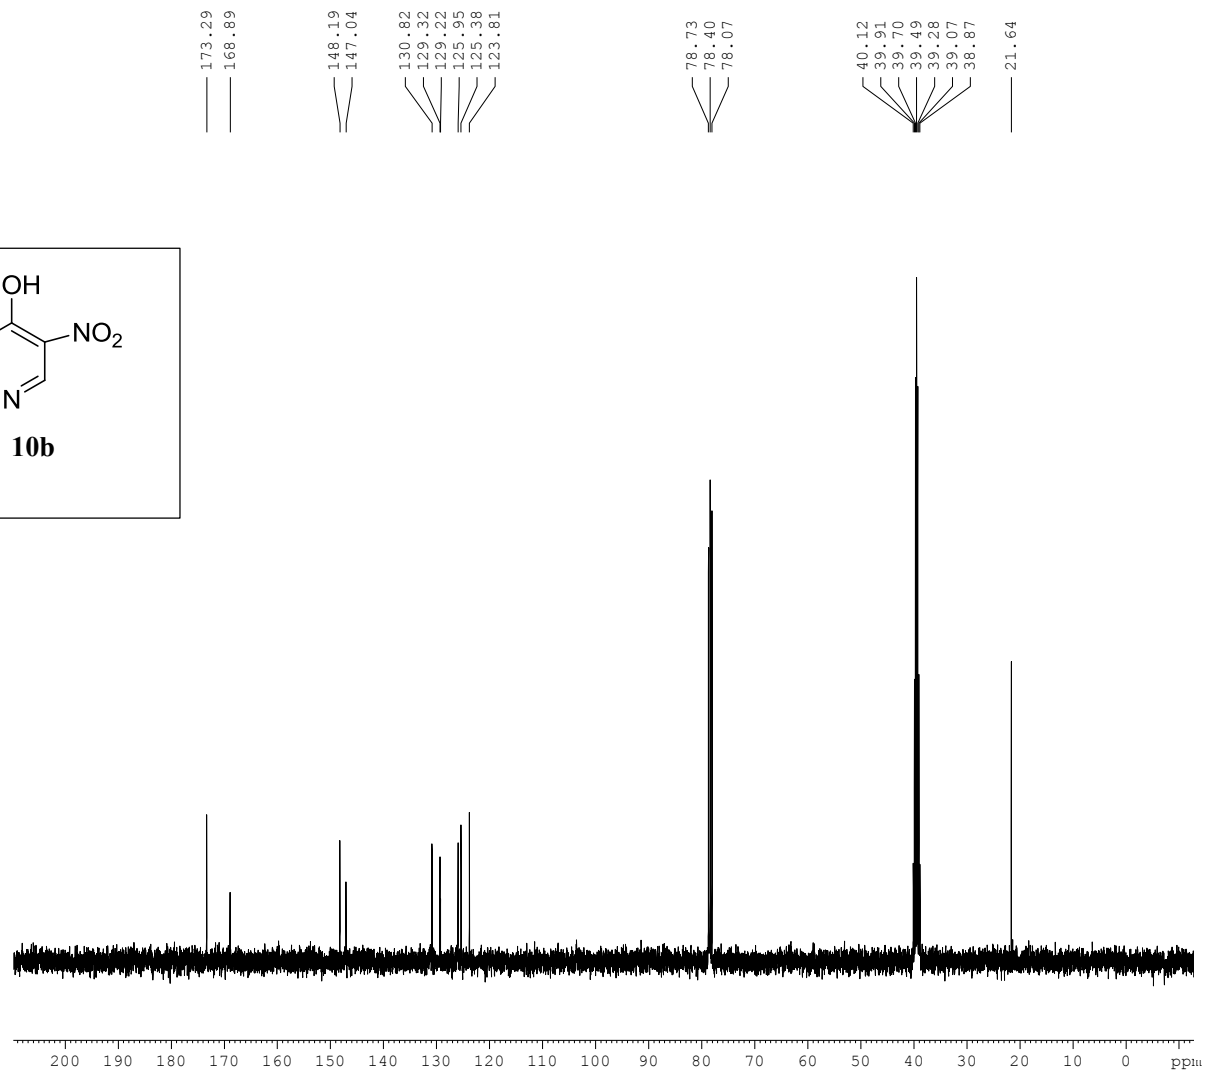



# <sup>1</sup>H NMR

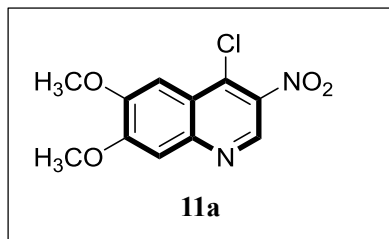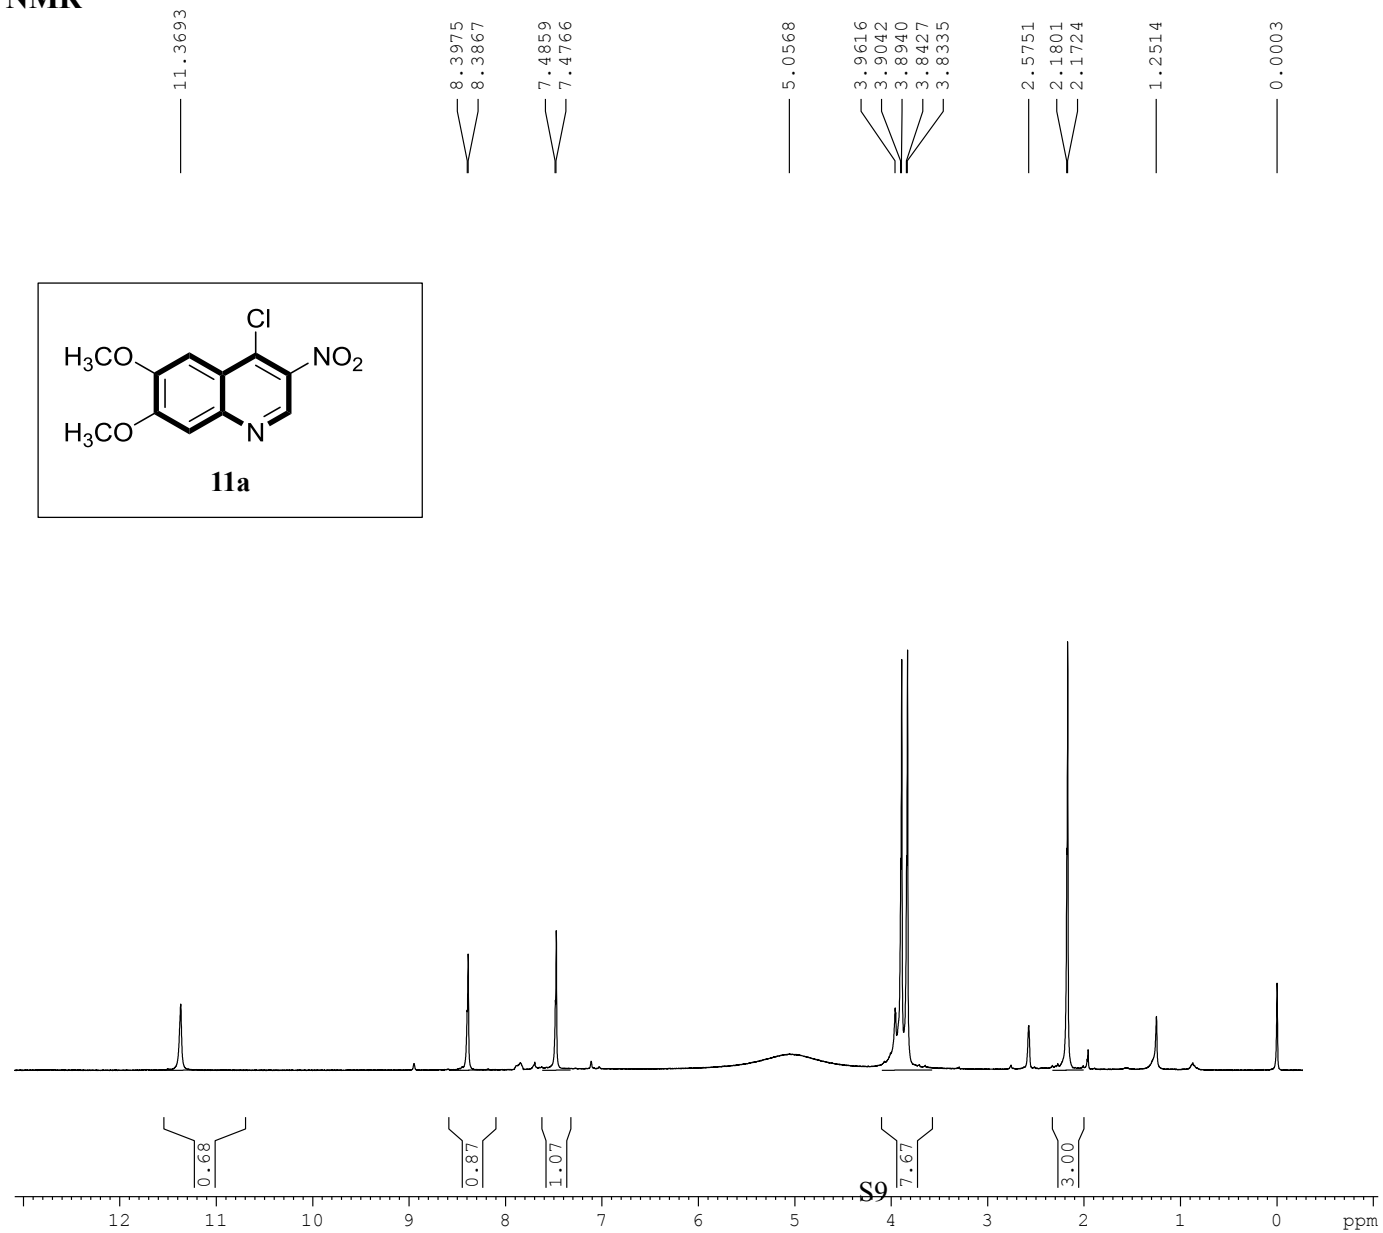

**<sup>13</sup>C NMR**

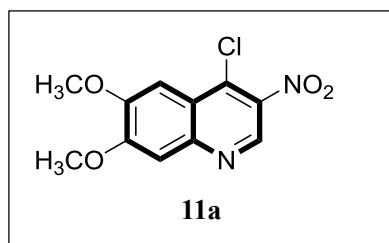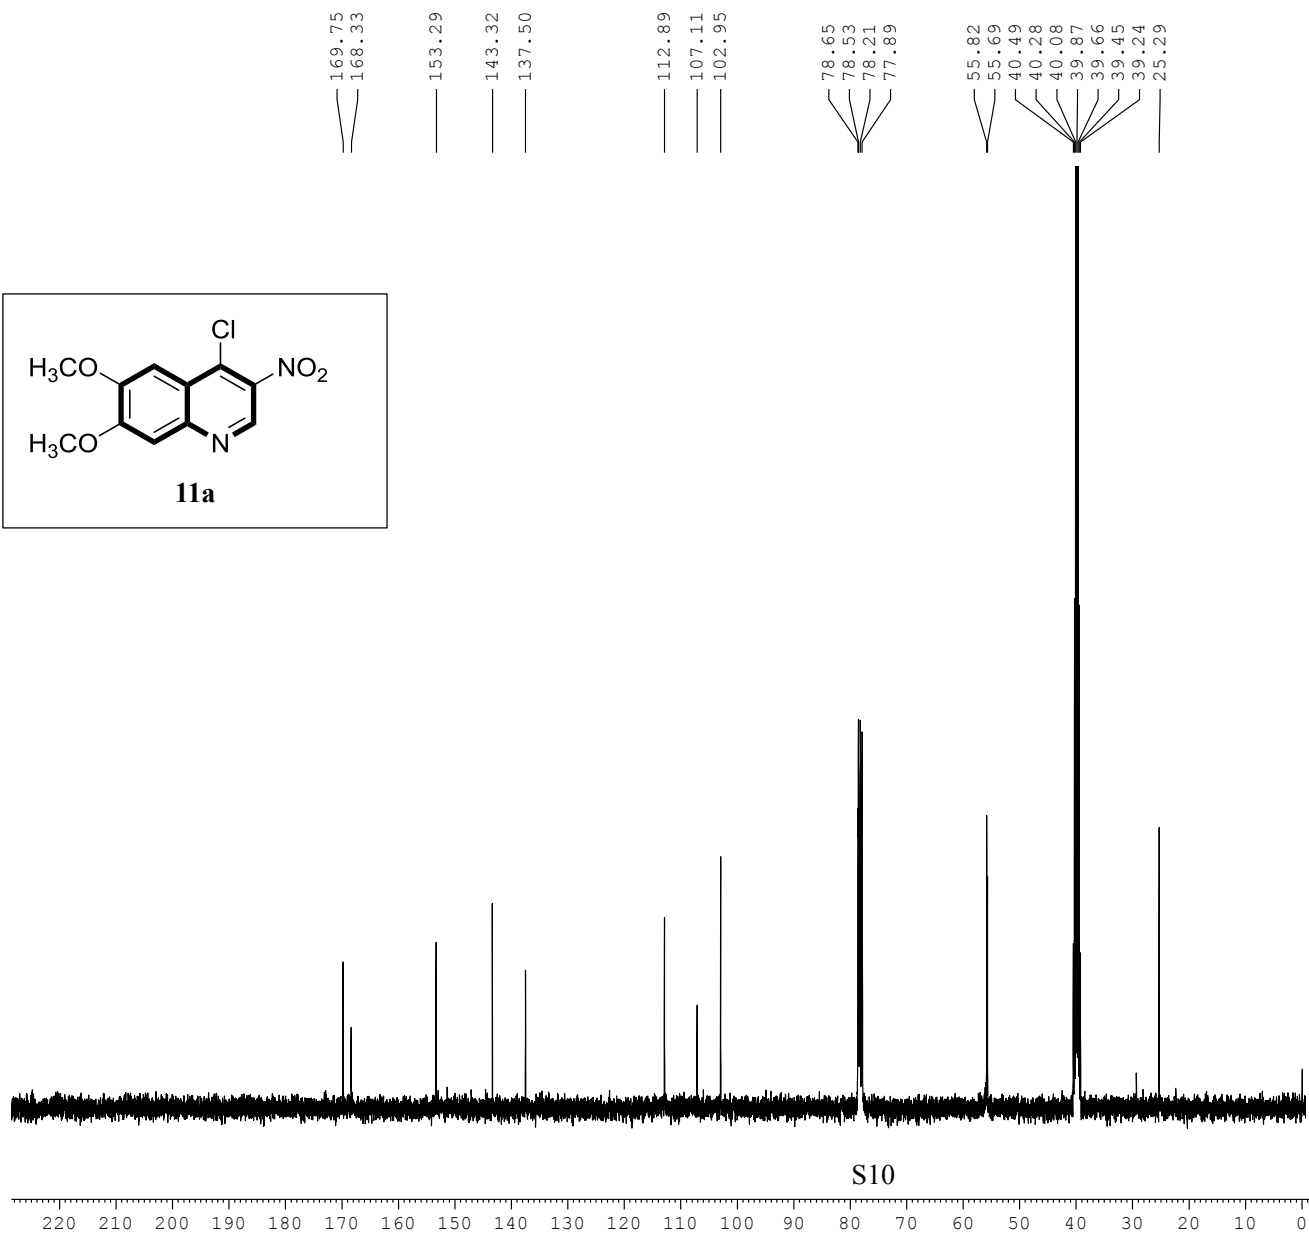

# <sup>1</sup>H NMR

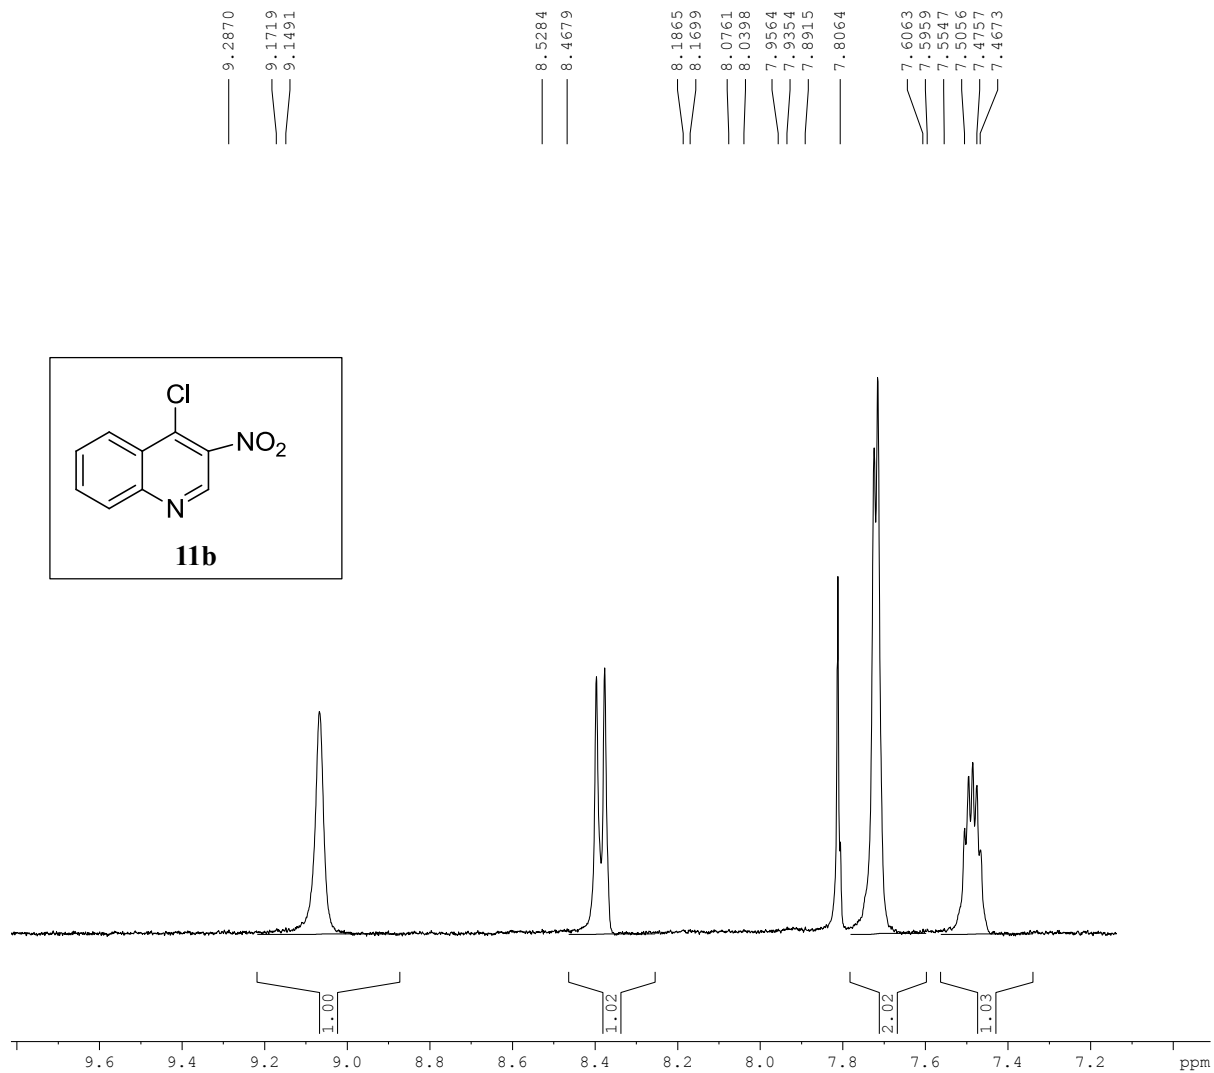

<sup>1</sup>H NMR

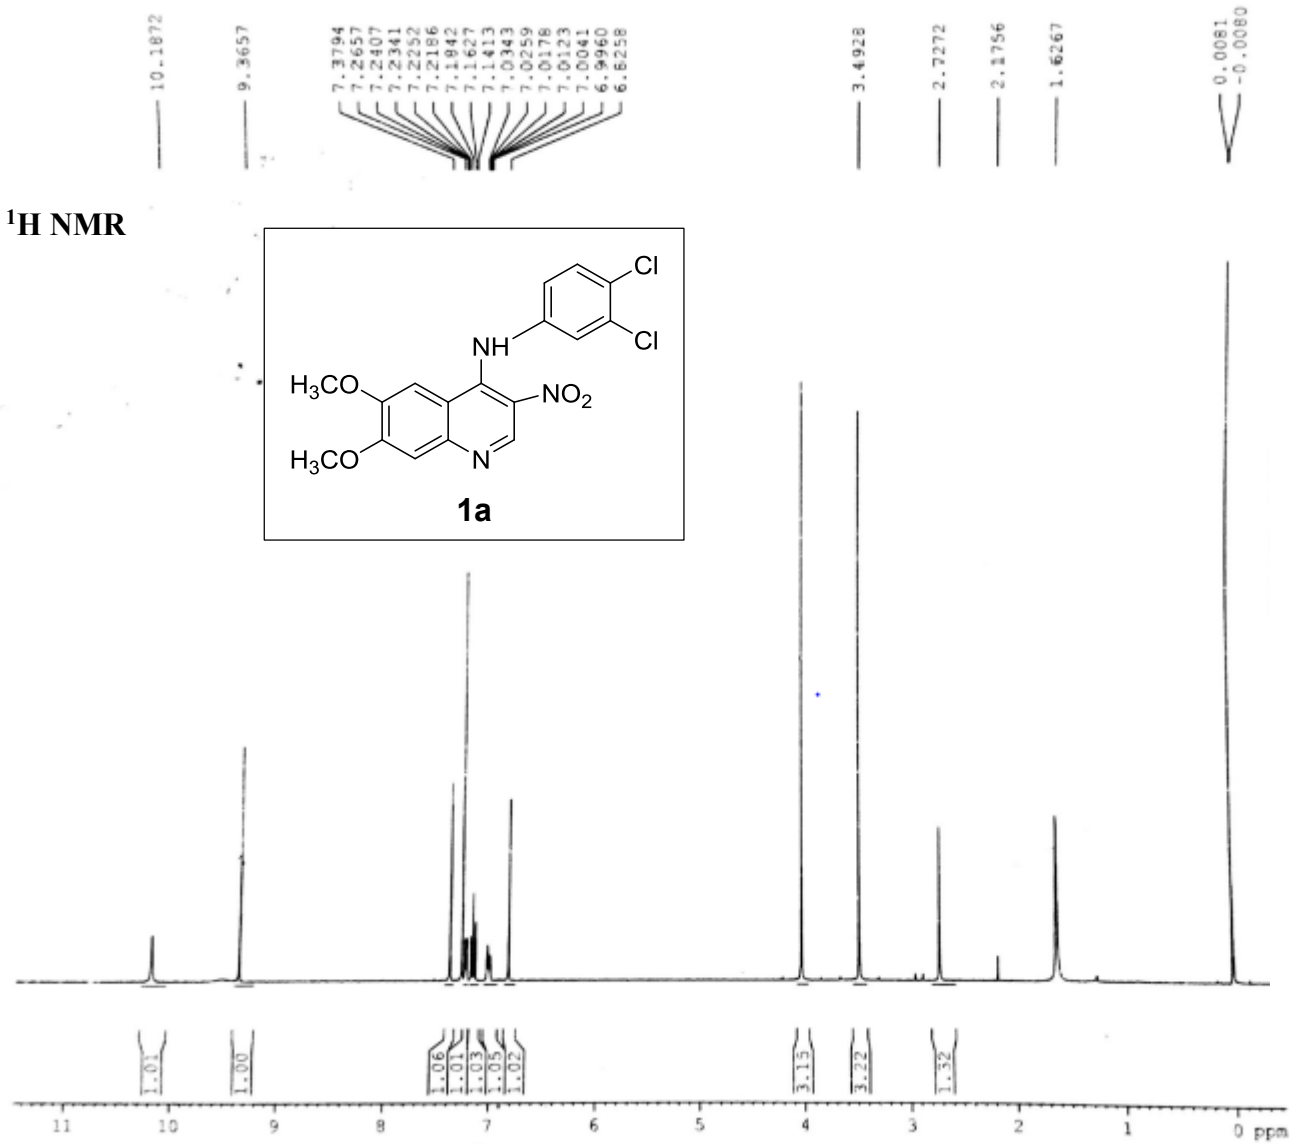

<sup>1</sup>H NMR

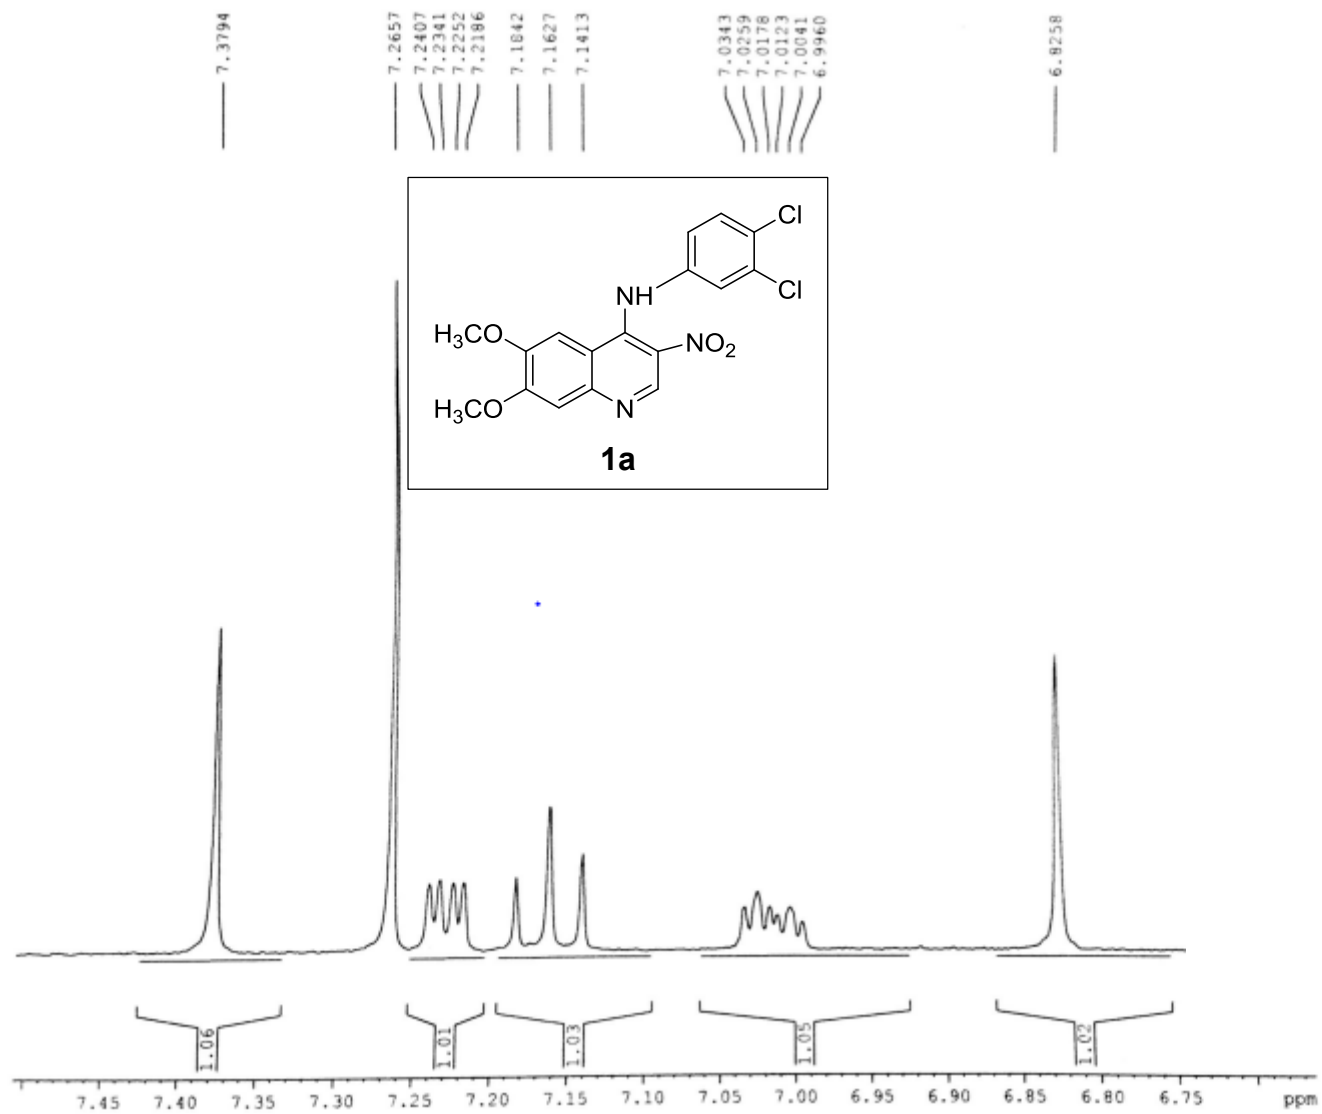

<sup>1</sup>H NMR

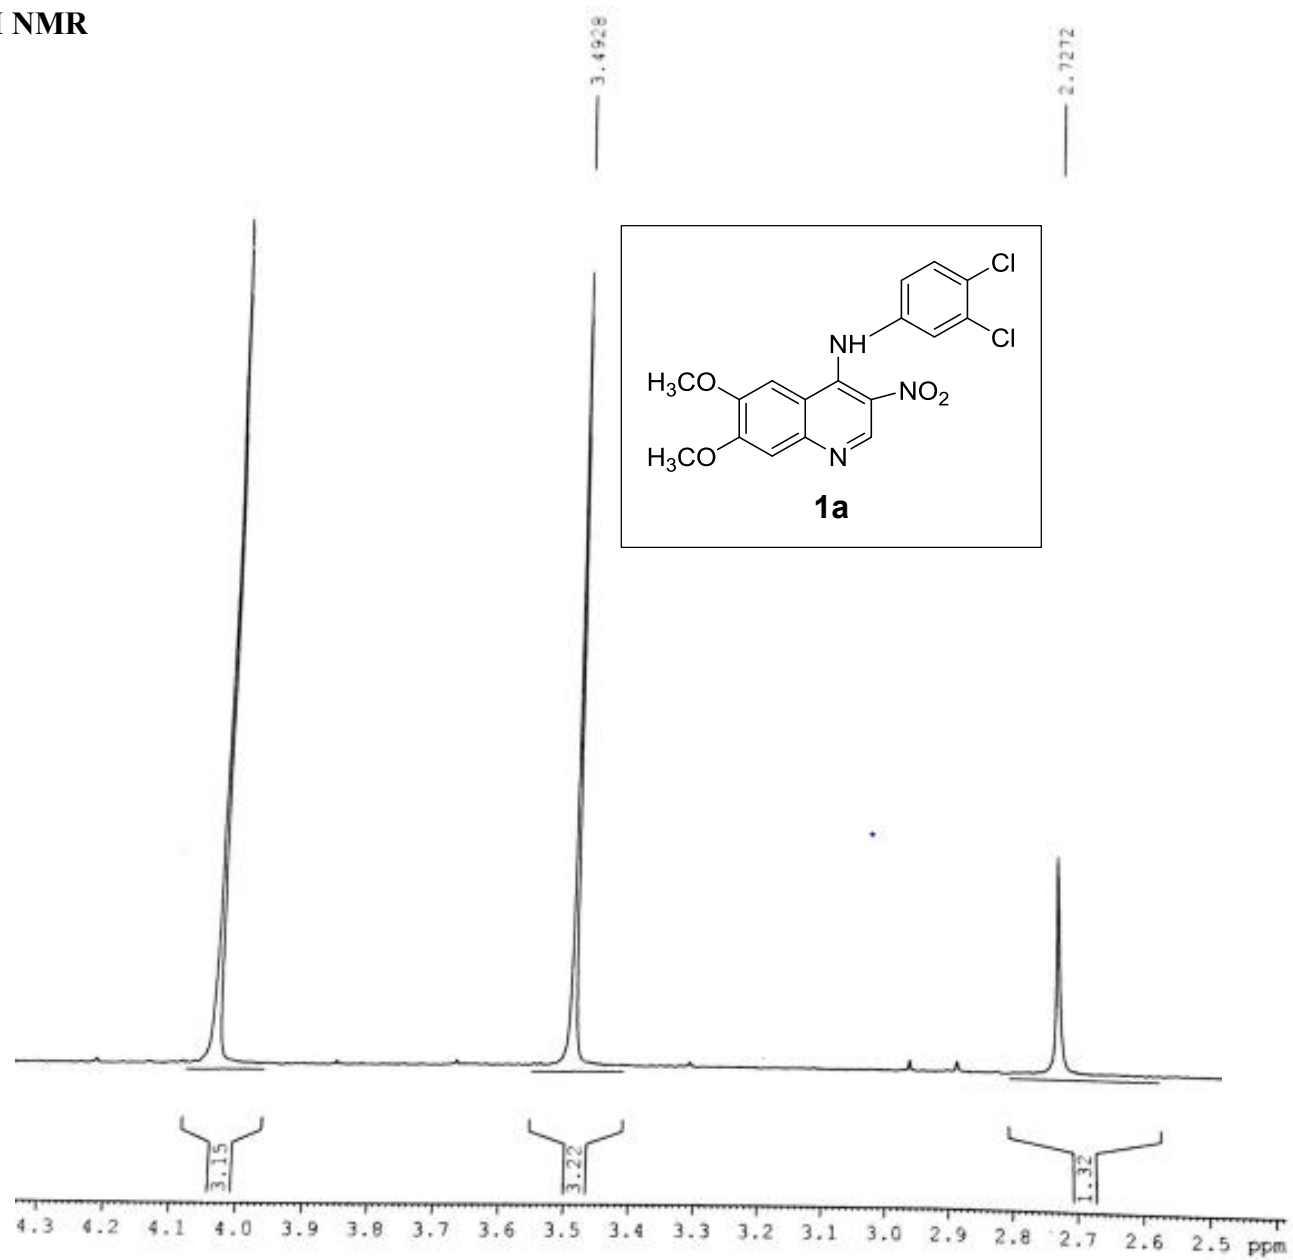

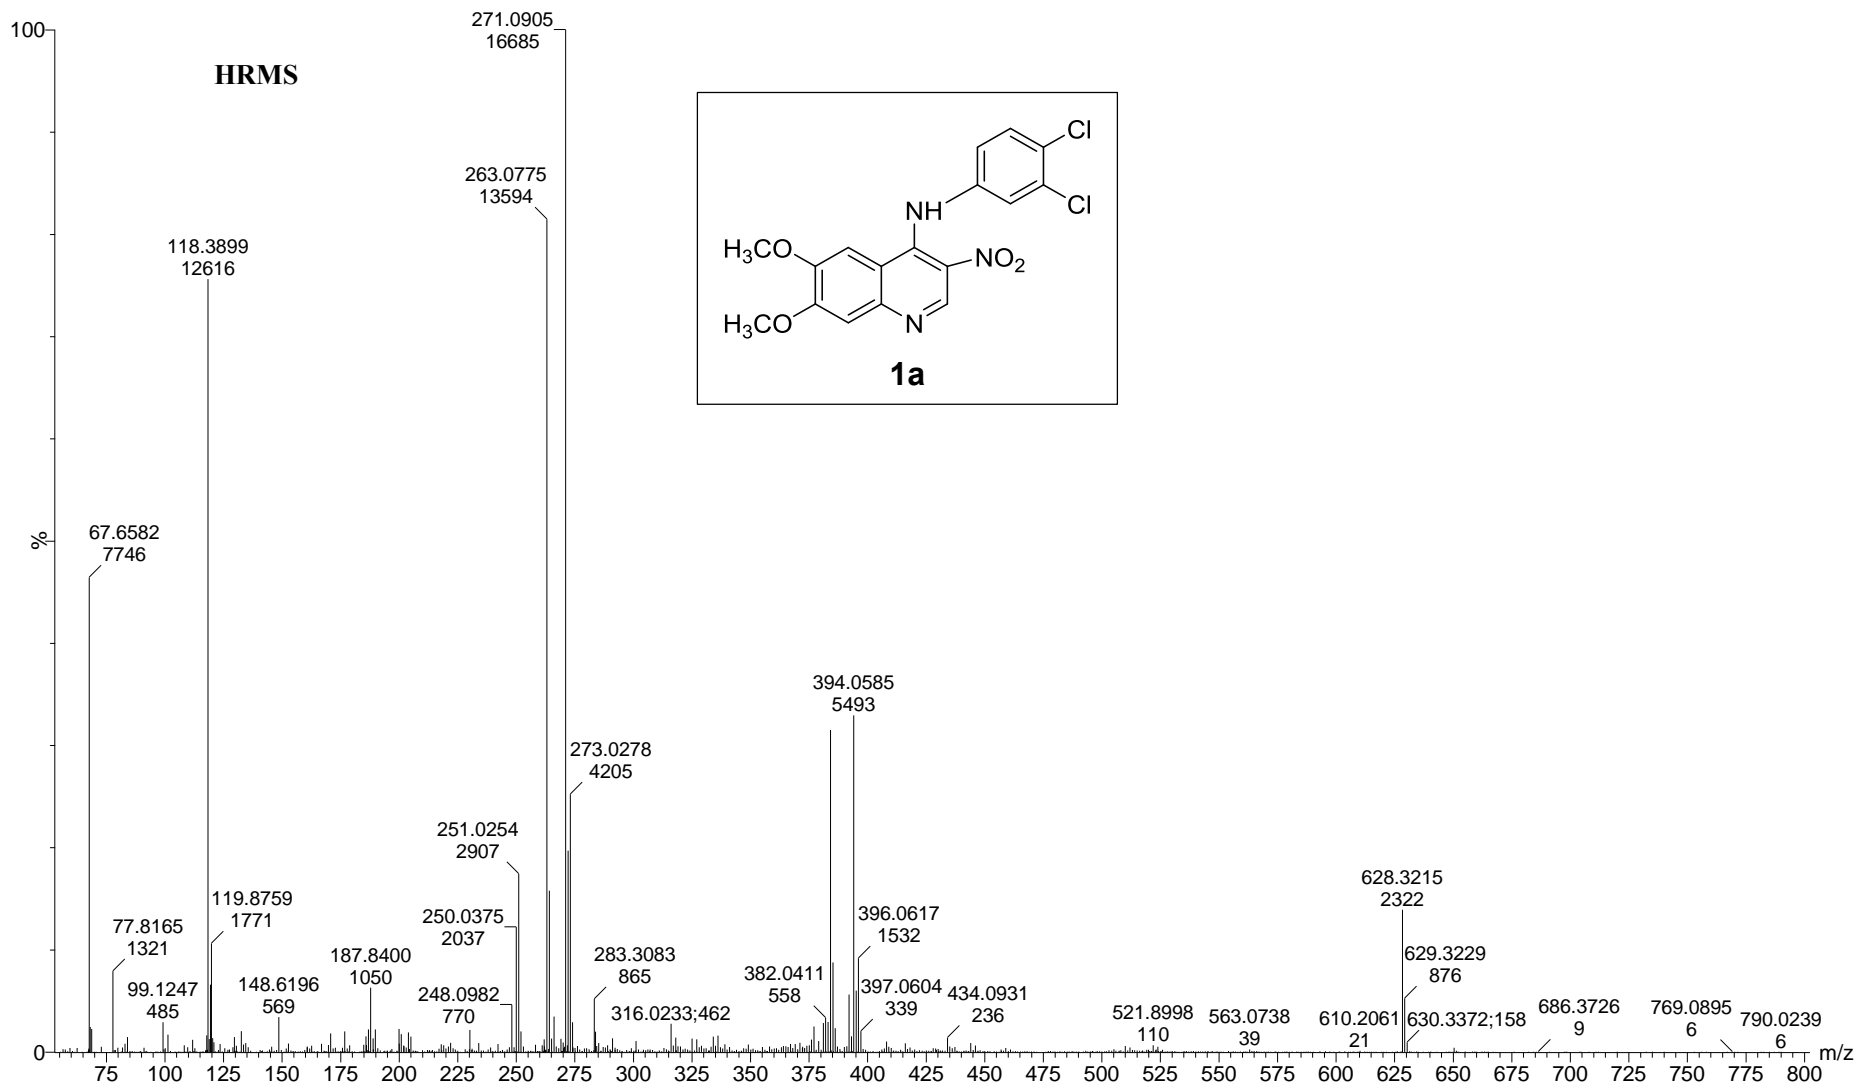

# <sup>1</sup>H NMR

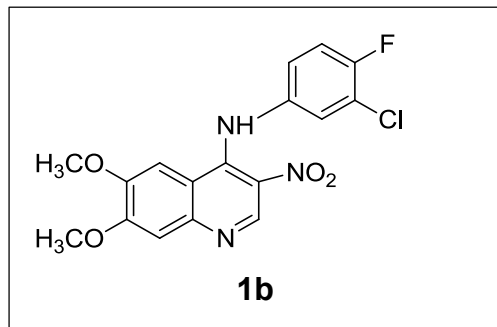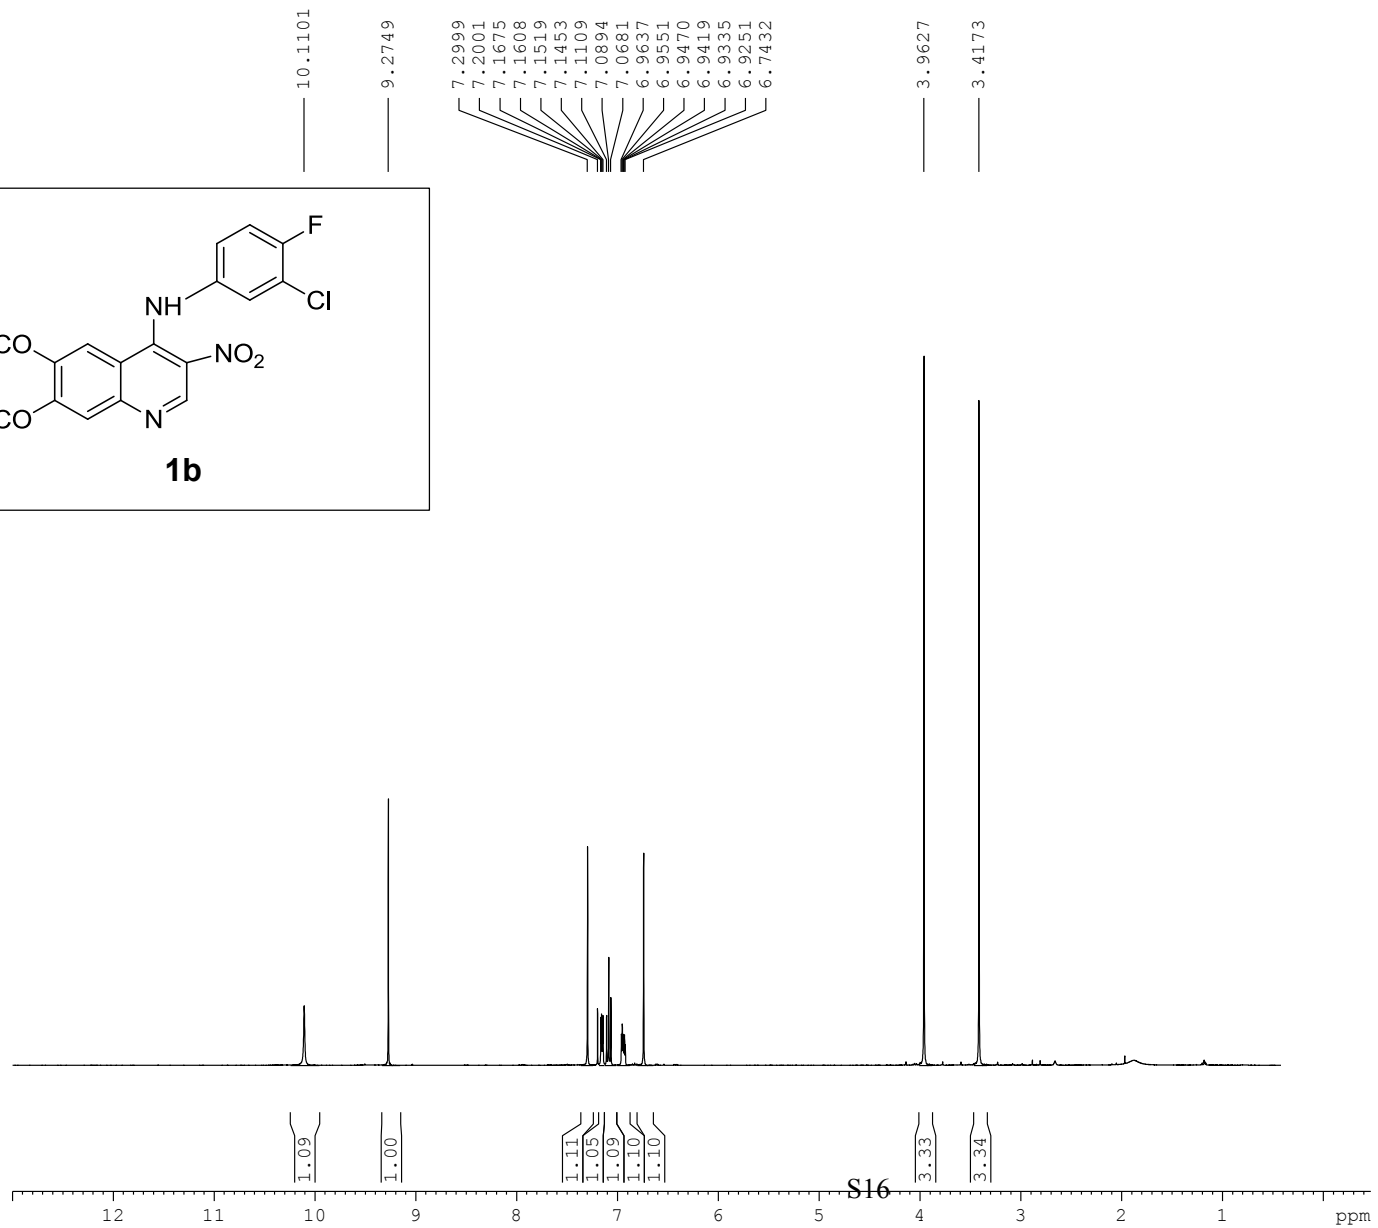



# <sup>1</sup>H NMR

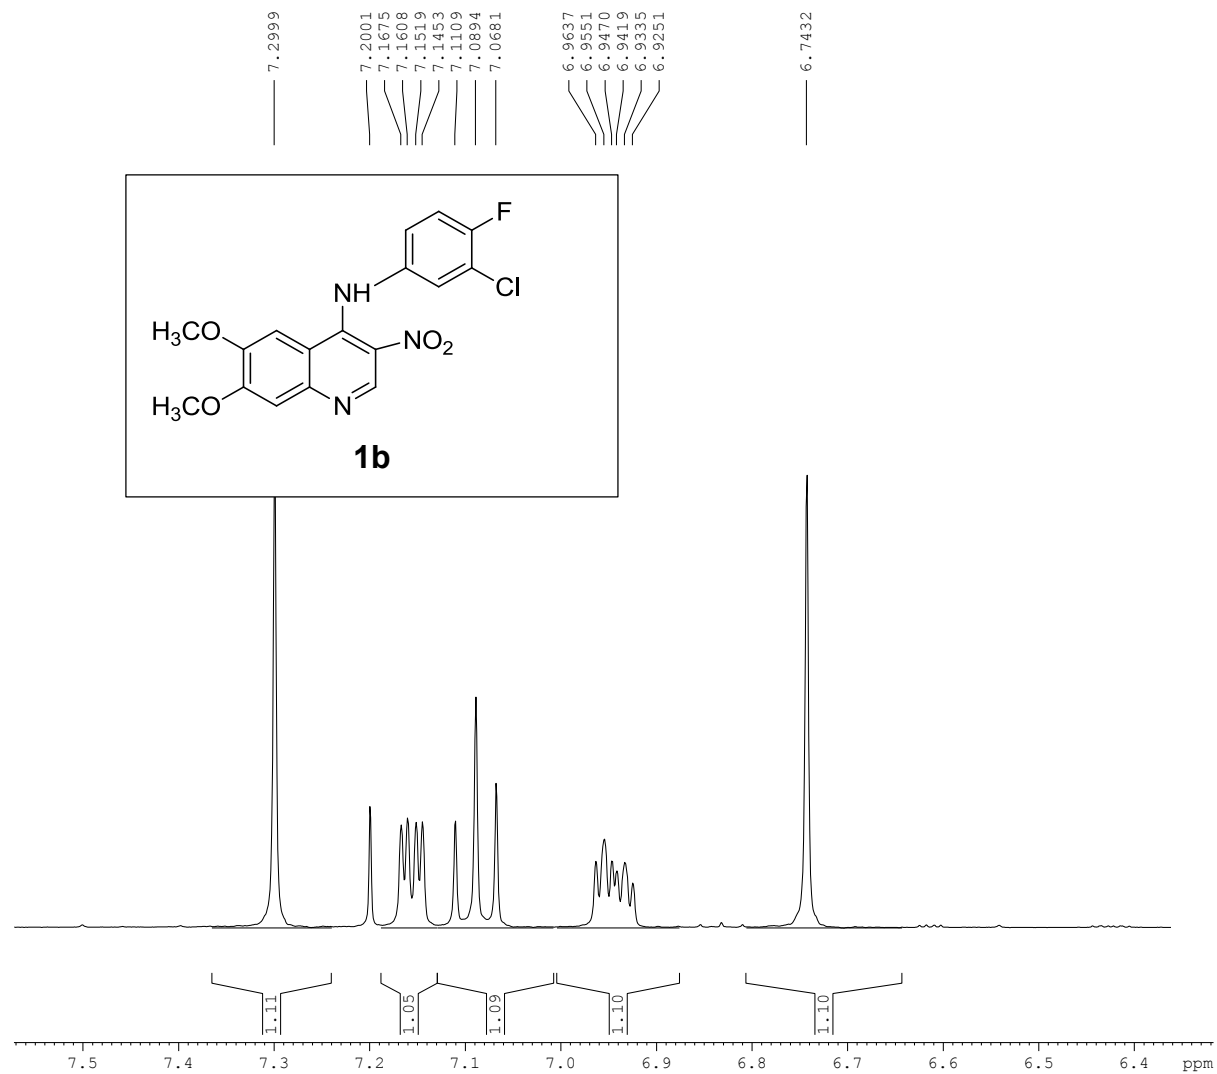

**<sup>1</sup>H NMR**

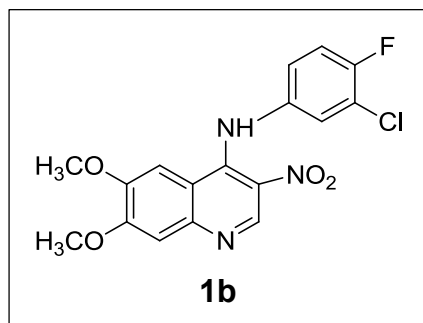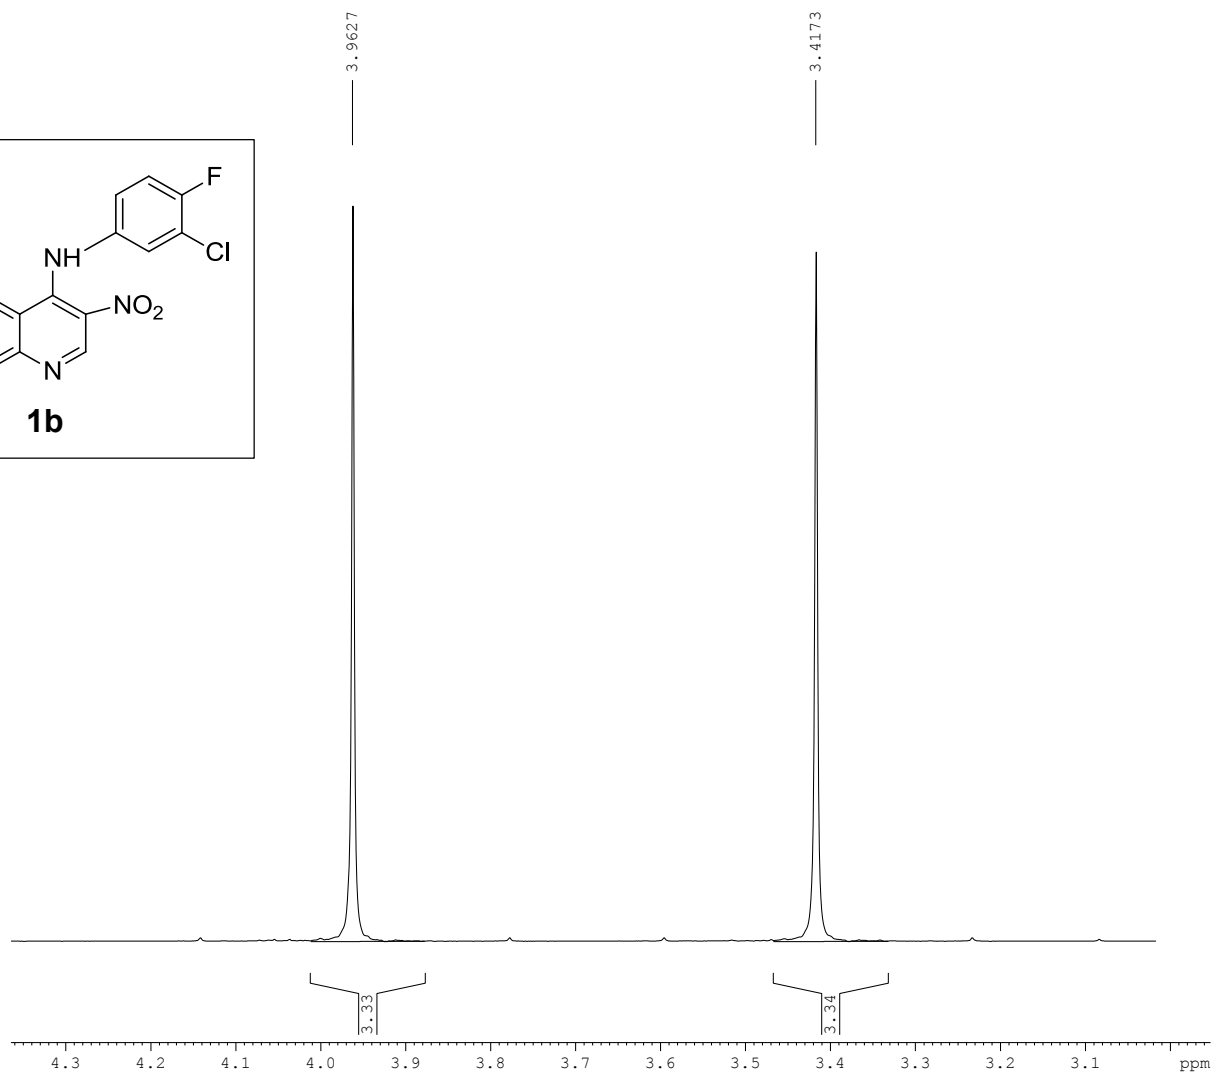

<sup>13</sup>C NMR

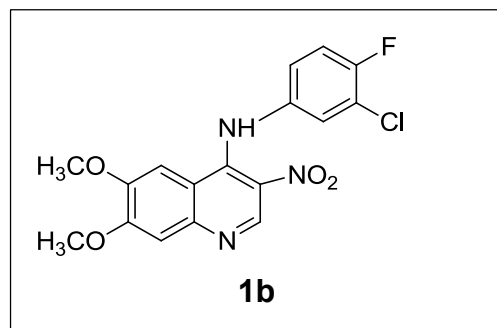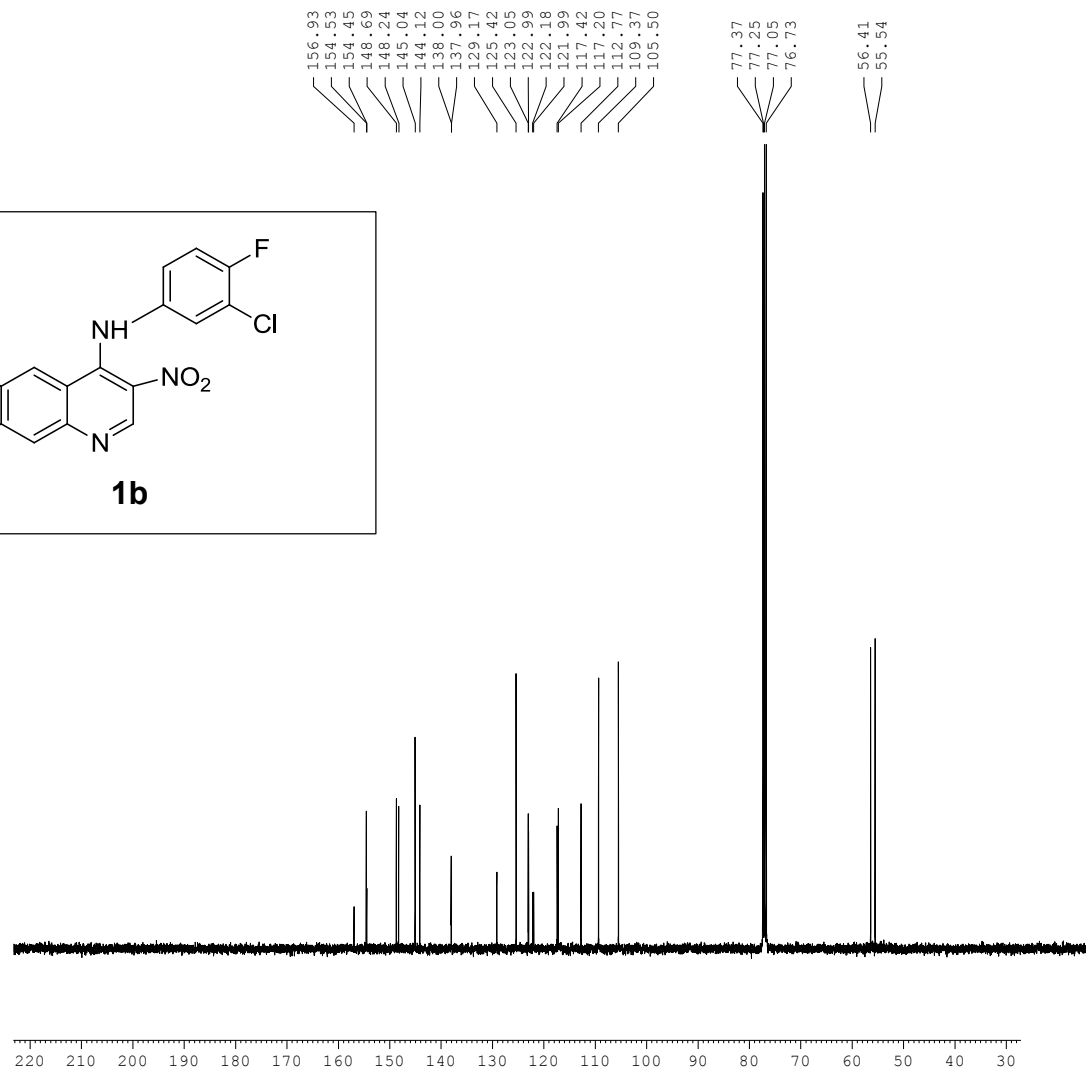

# <sup>13</sup>C NMR

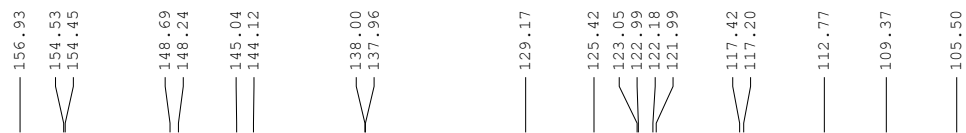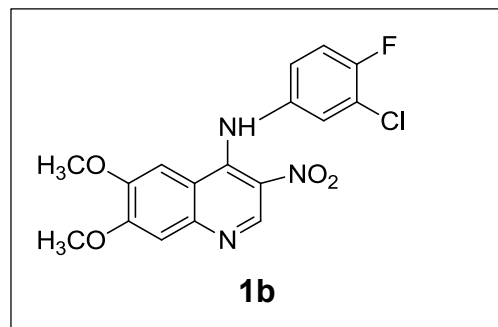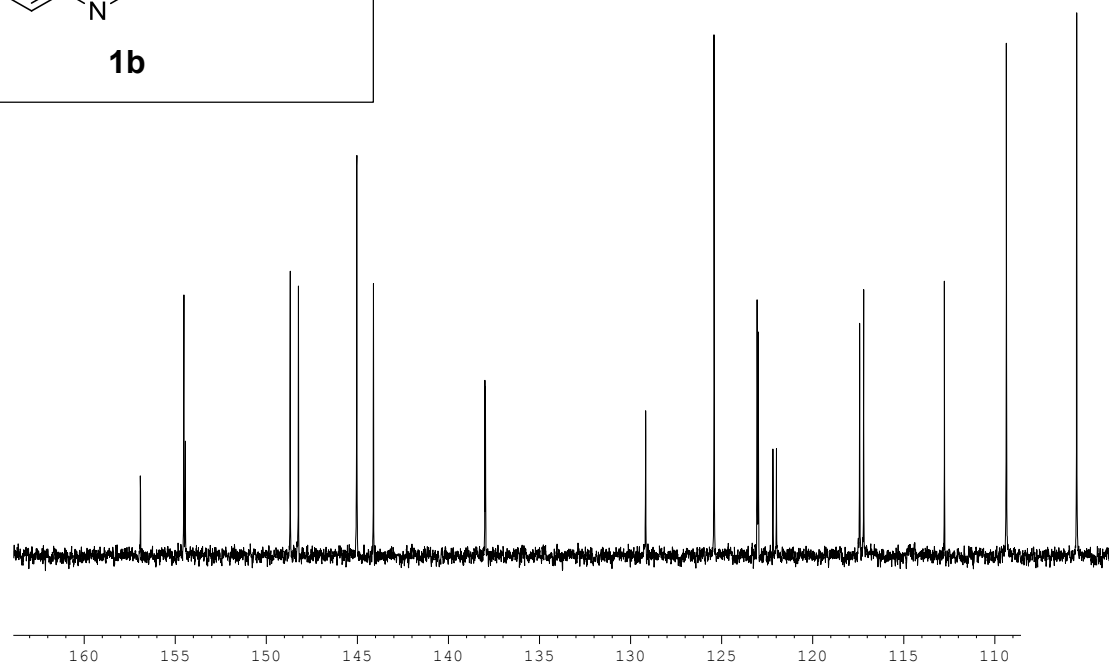

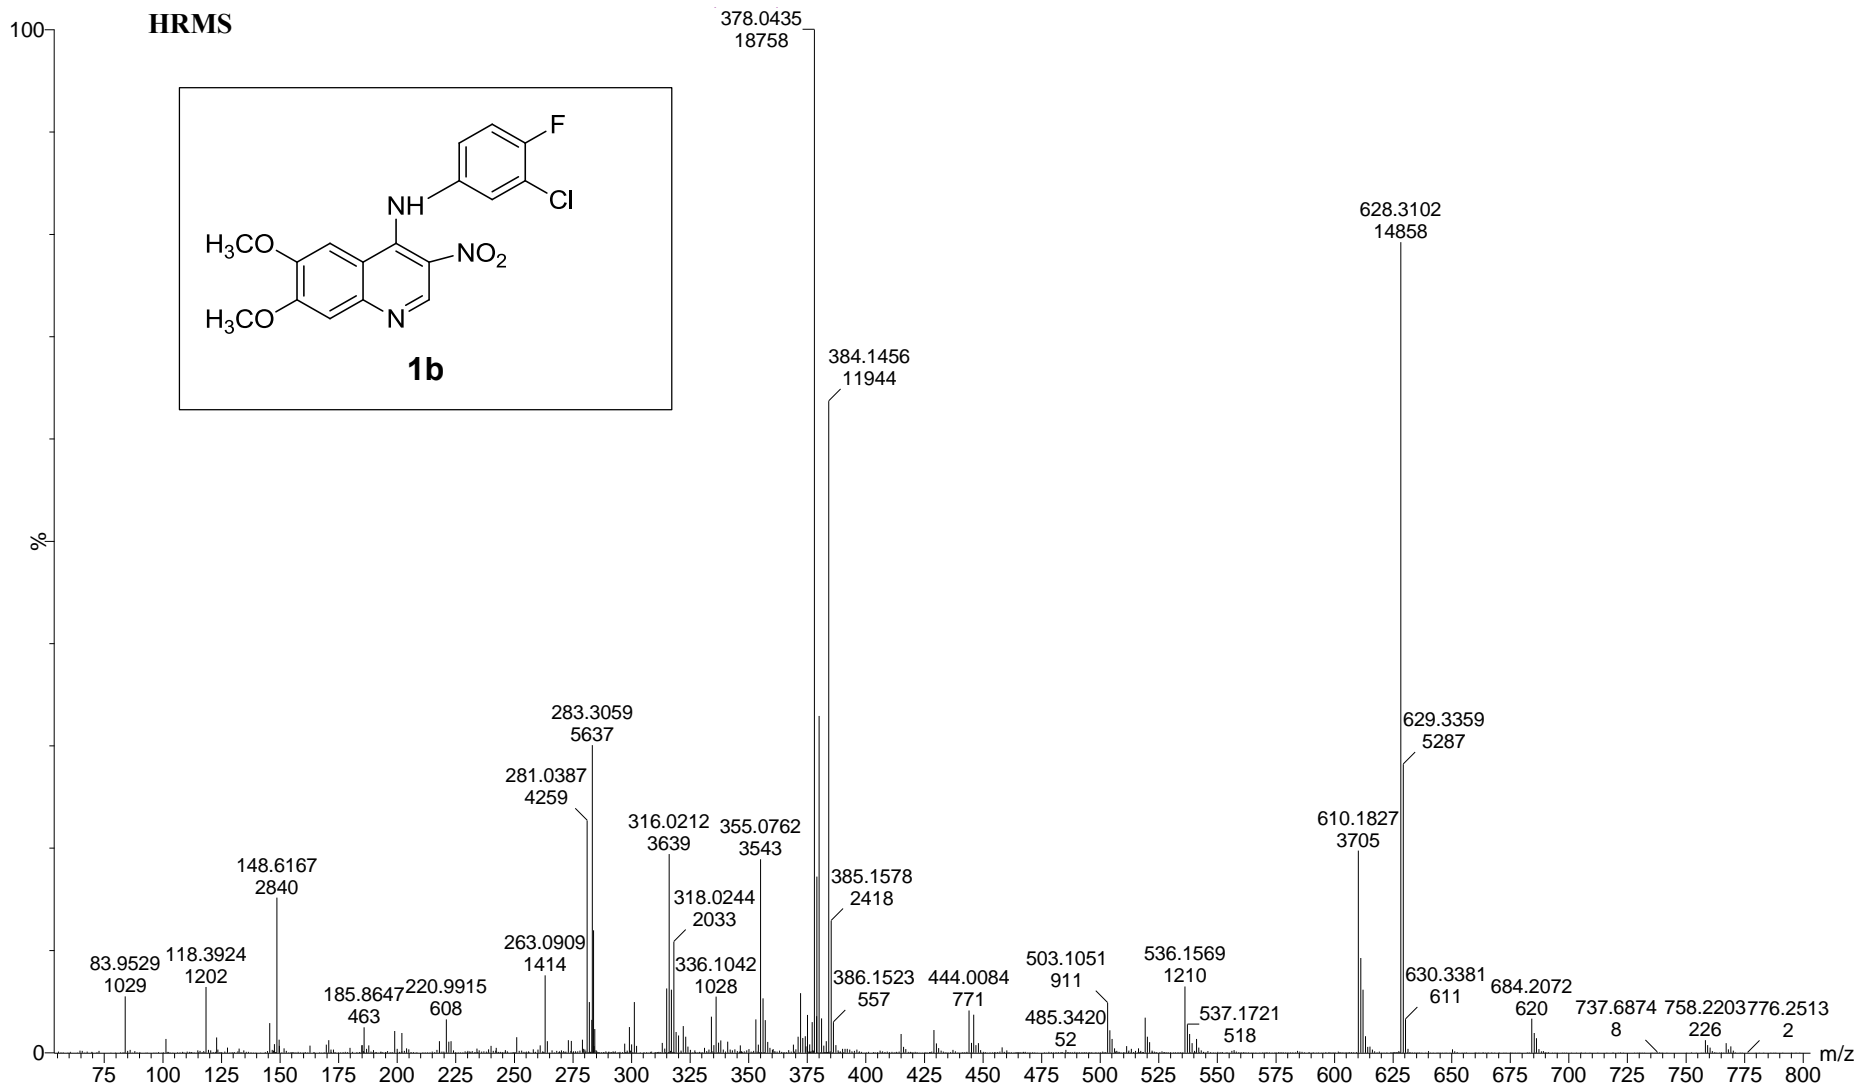

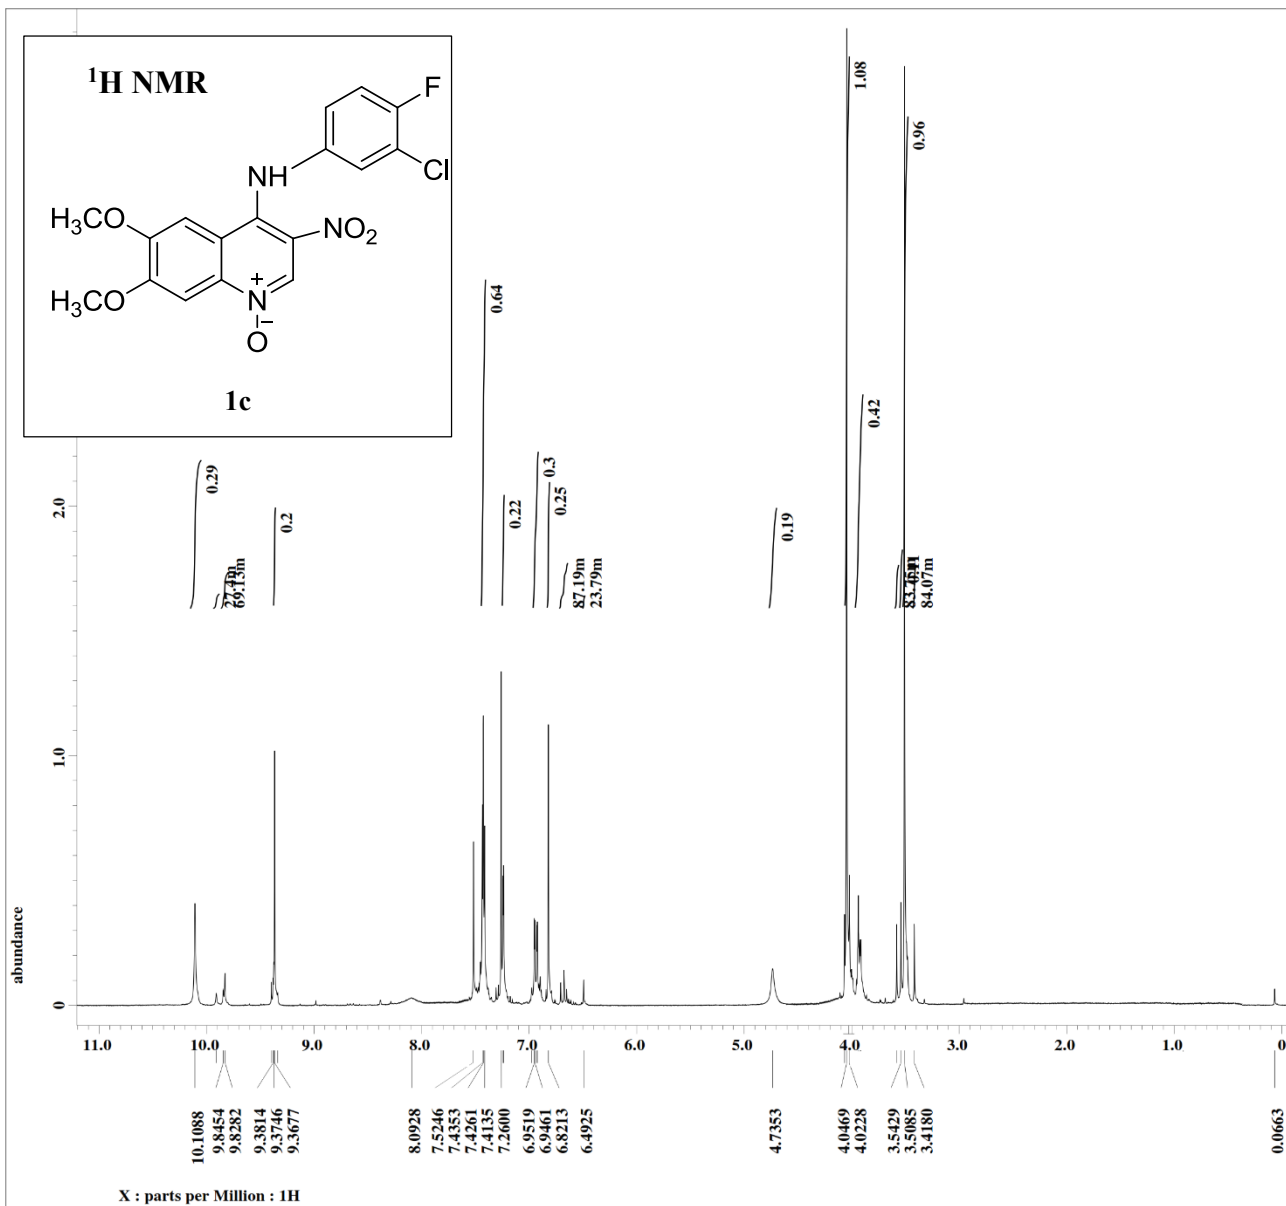

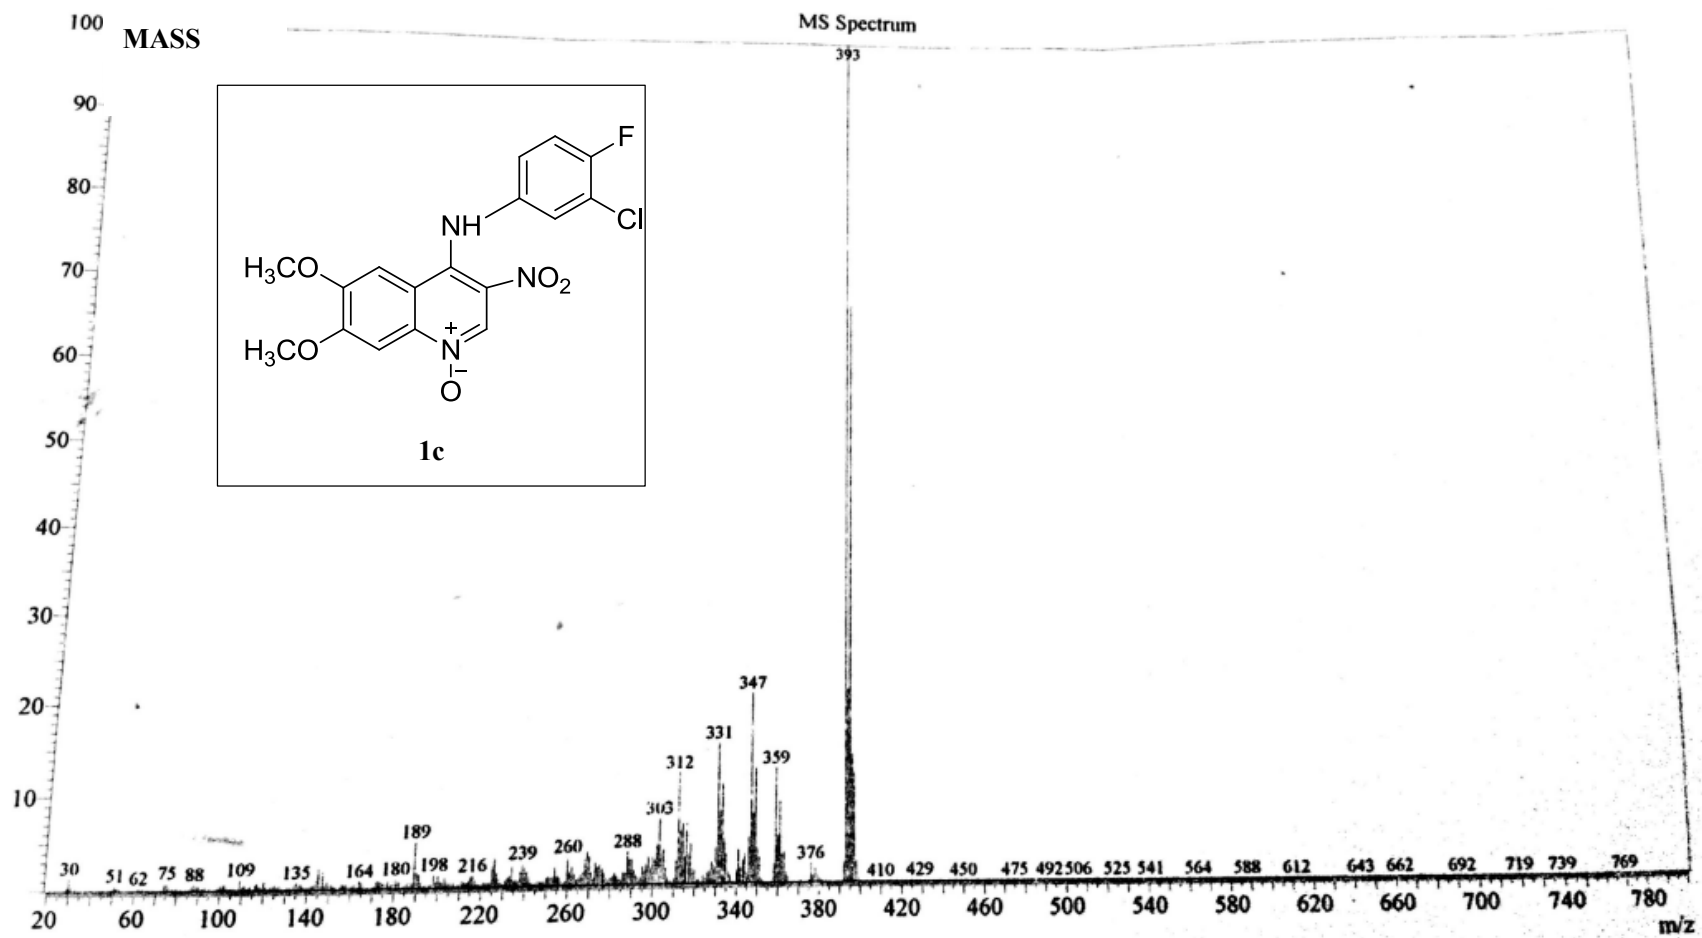

<sup>1</sup>H NMR

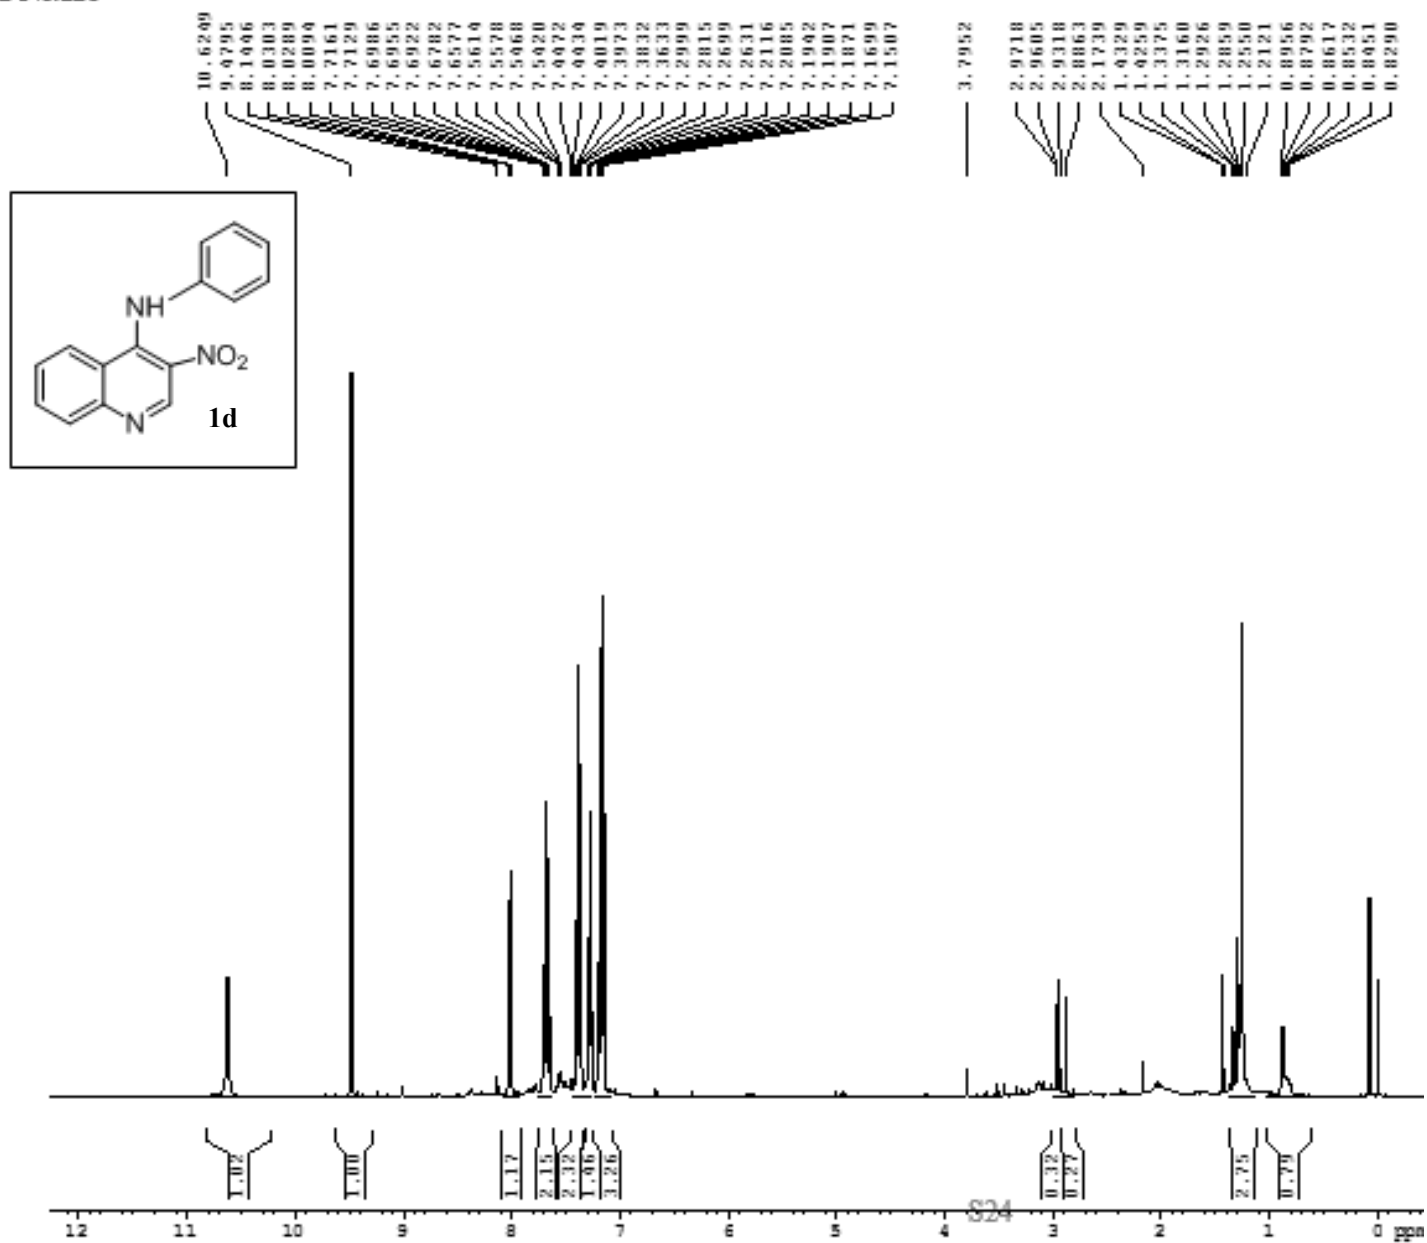



# <sup>1</sup>H NMR

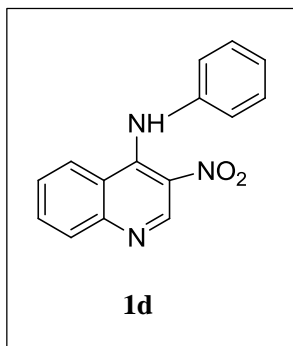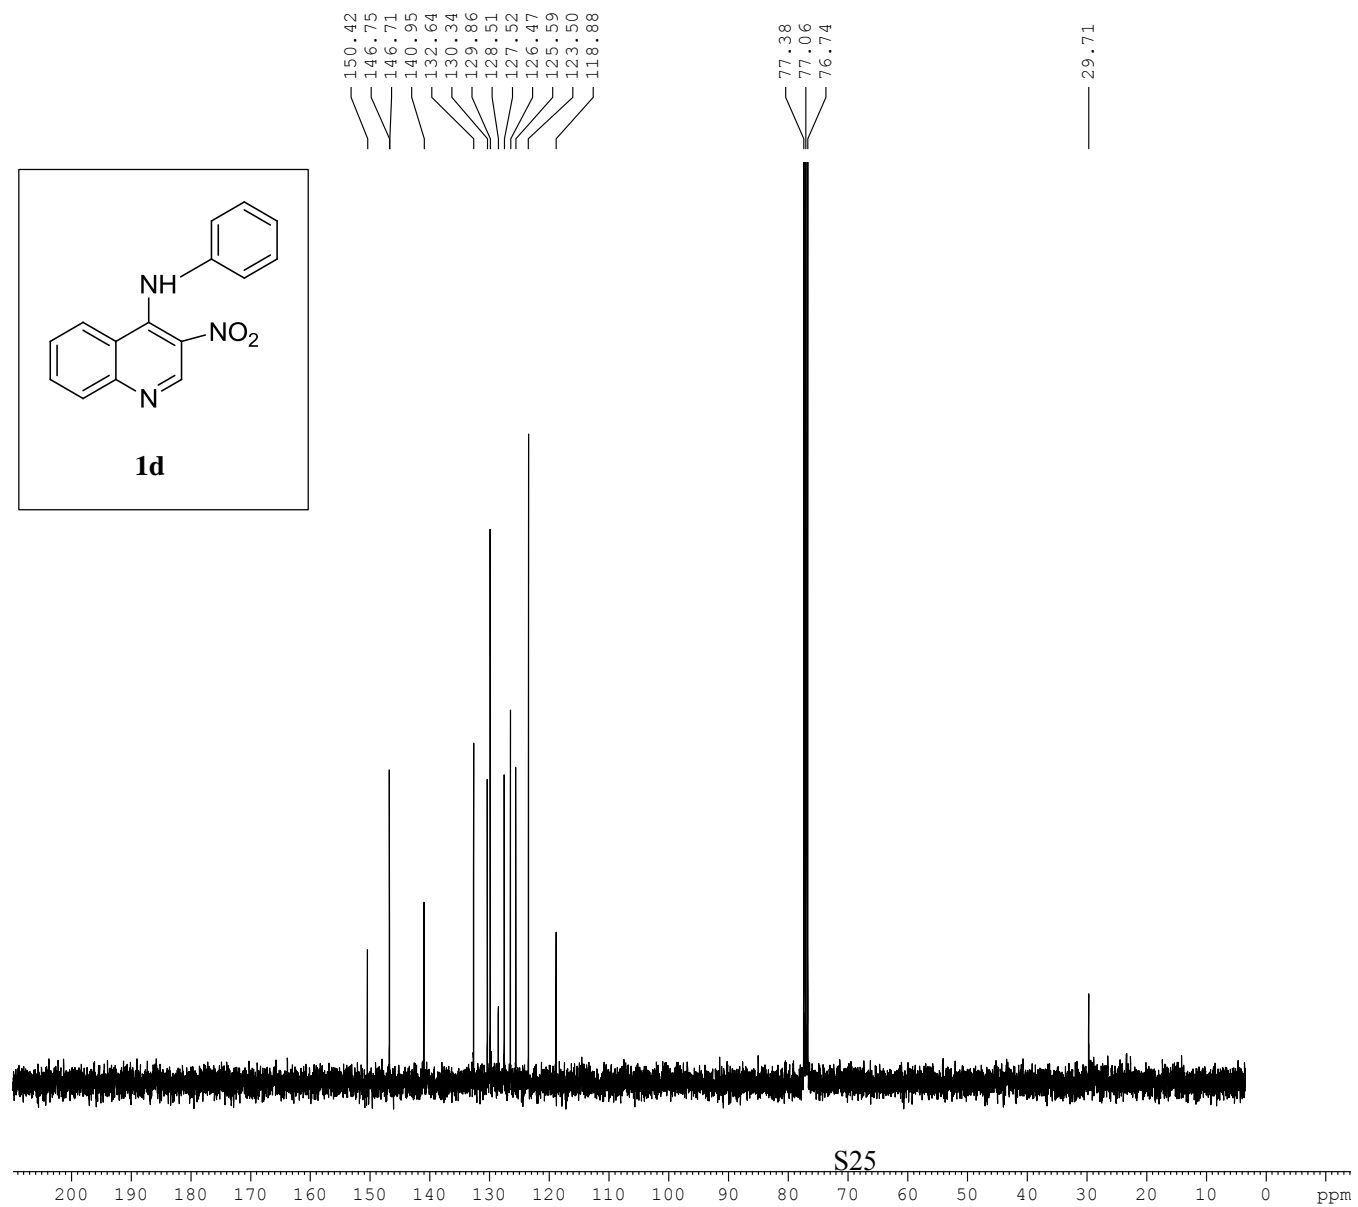

# <sup>1</sup>H NMR

10.8953

8.4015

7.4273

7.1931

3.9691  
3.9039  
3.8473  
3.8213  
3.4264

2.1628  
2.0522

1.2144  
1.1861  
0.8106

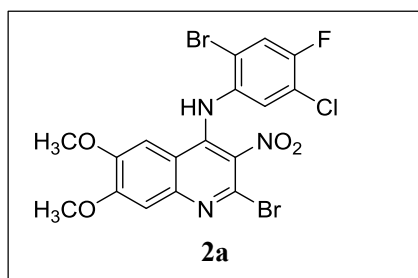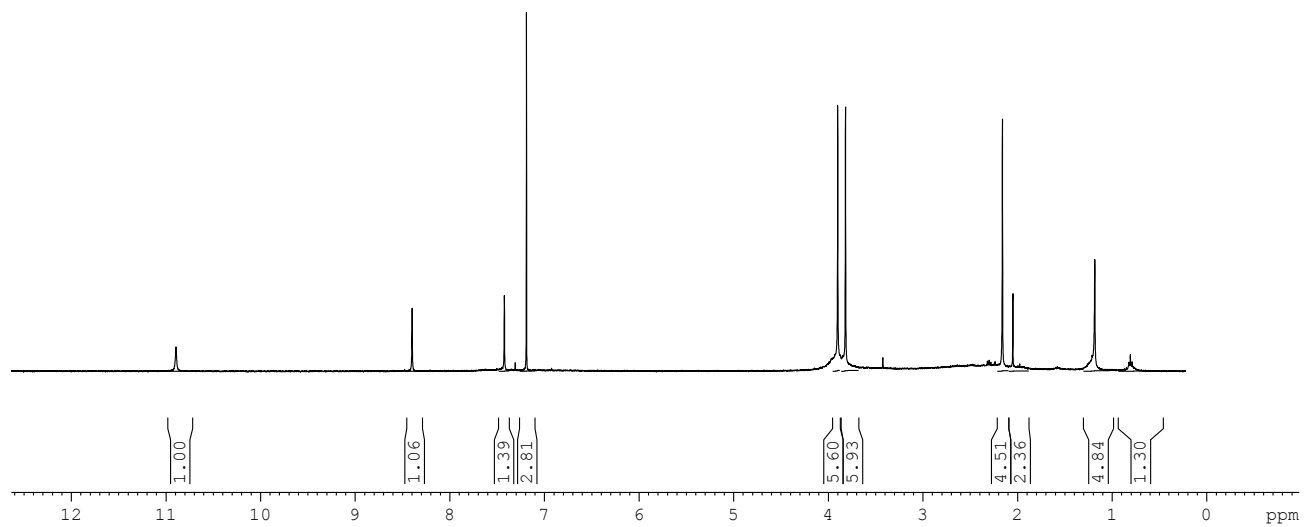

# <sup>1</sup>H NMR

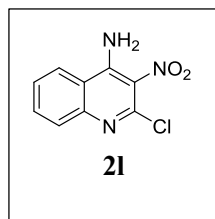

8.3266  
8.3063  
8.1437  
8.1229  
8.0547  
7.9851  
7.9649  
7.9448  
7.9247  
7.7293  
7.7278  
7.7092  
7.6908  
7.5058  
7.4851  
7.4377  
7.4247  
7.4170  
7.4052  
7.3863  
7.2334  
7.2265  
7.1977  
6.8243

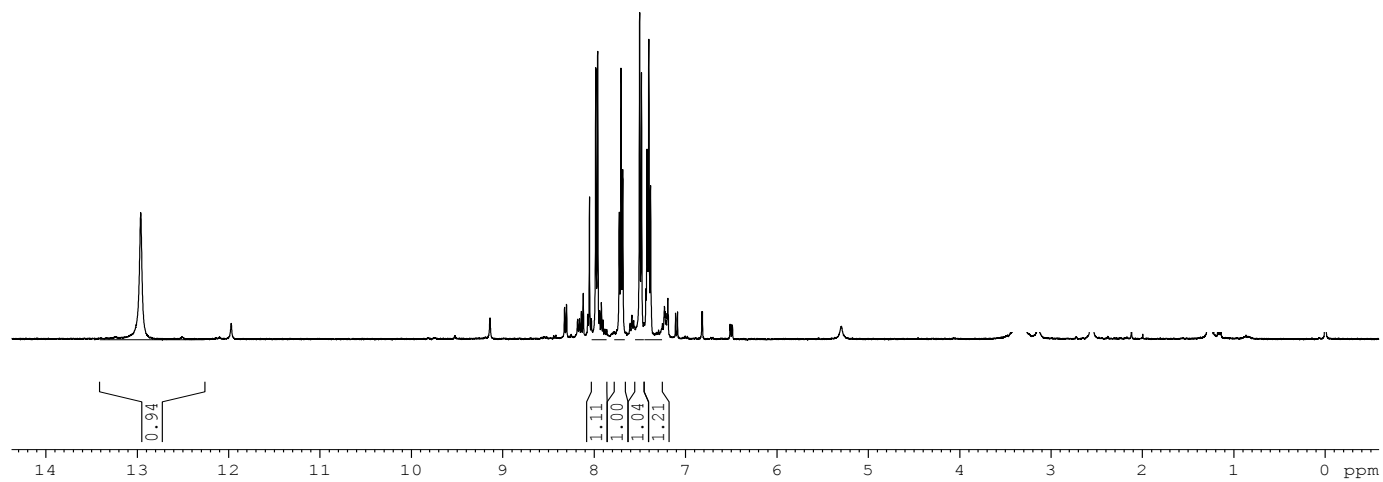

# <sup>1</sup>H NMR

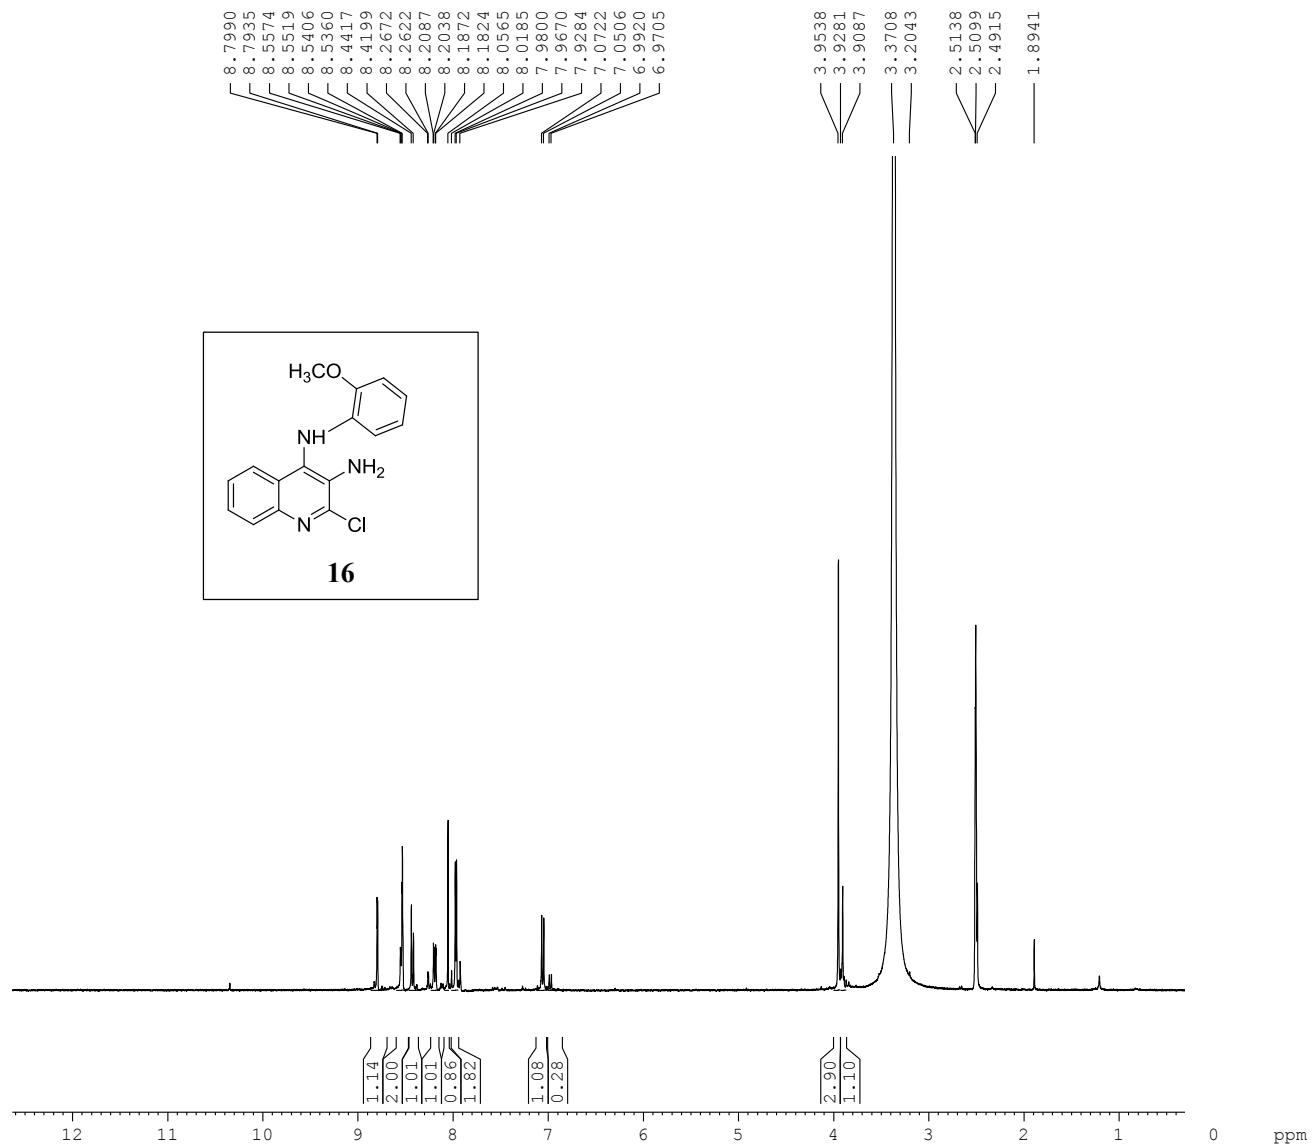

# <sup>1</sup>H NMR

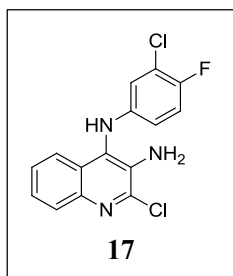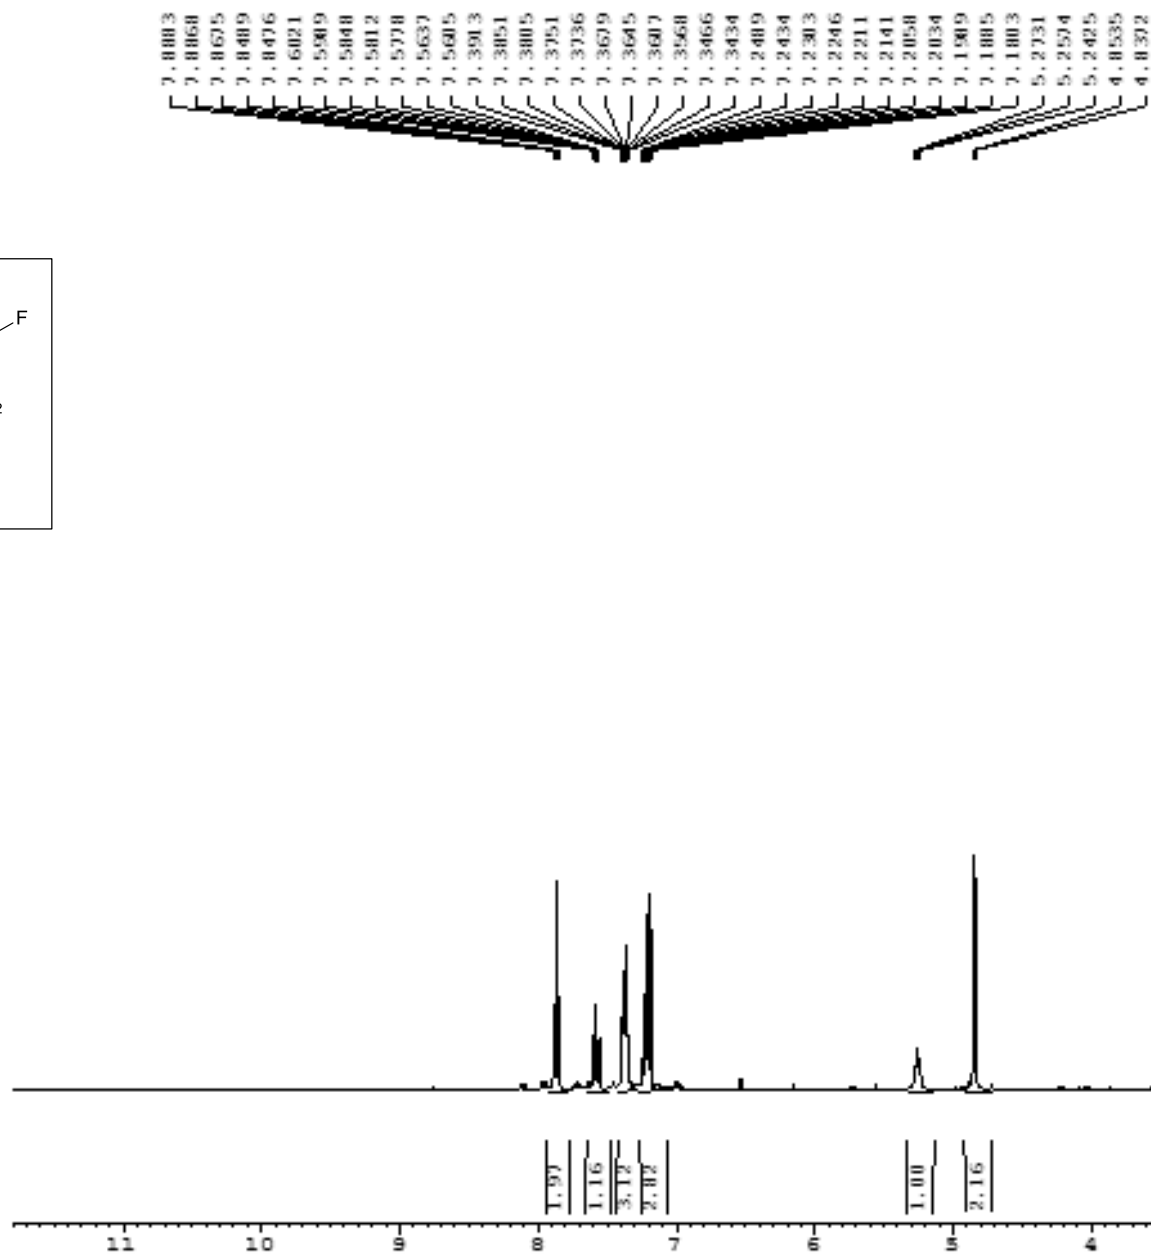

# <sup>1</sup>H NMR

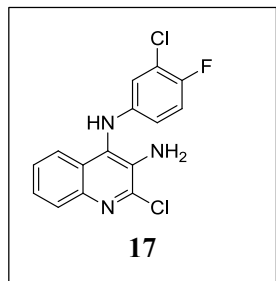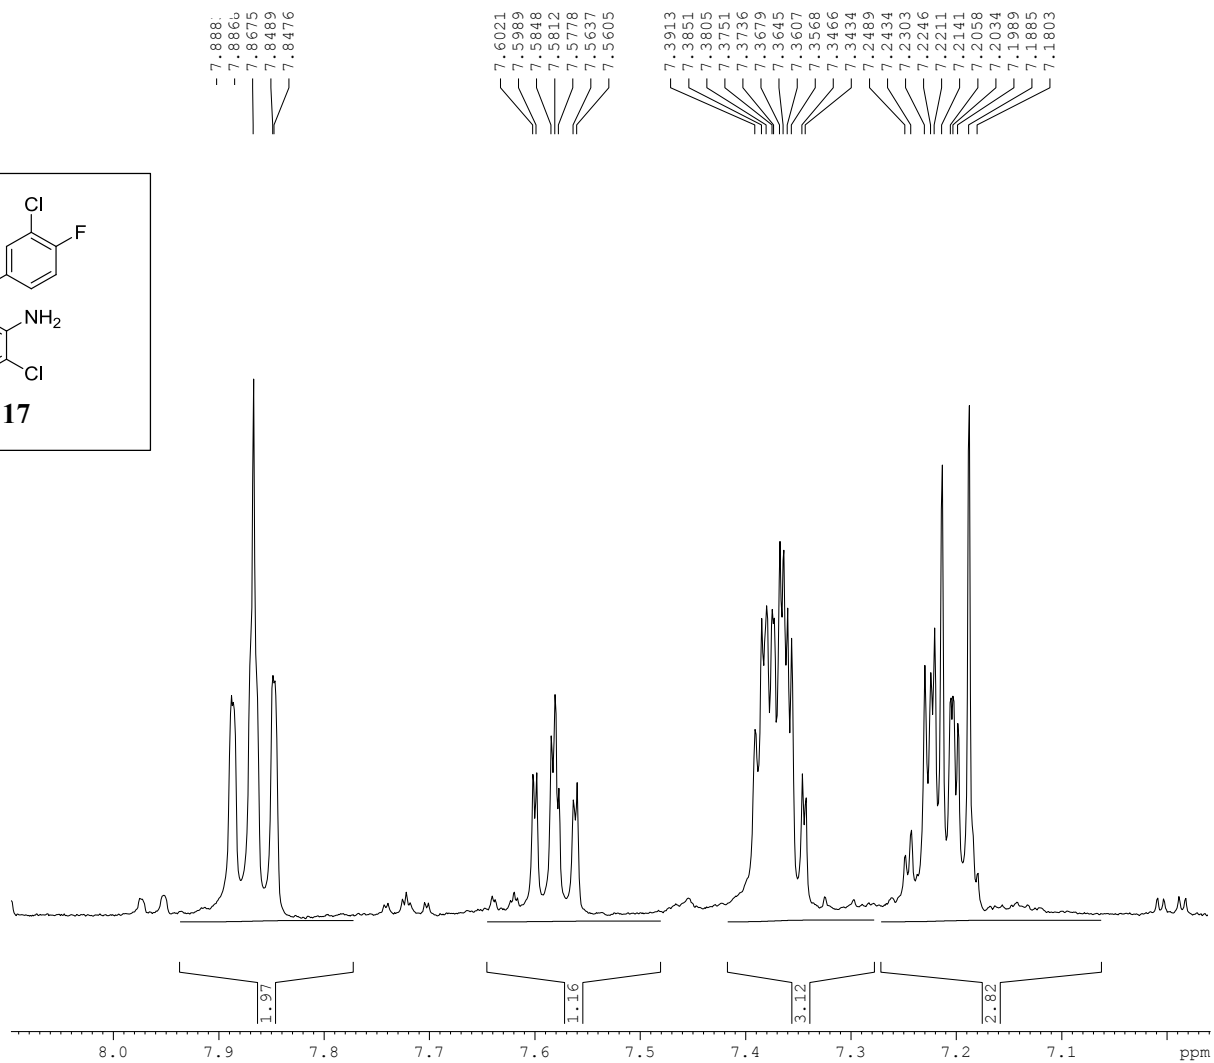

# <sup>1</sup>H NMR

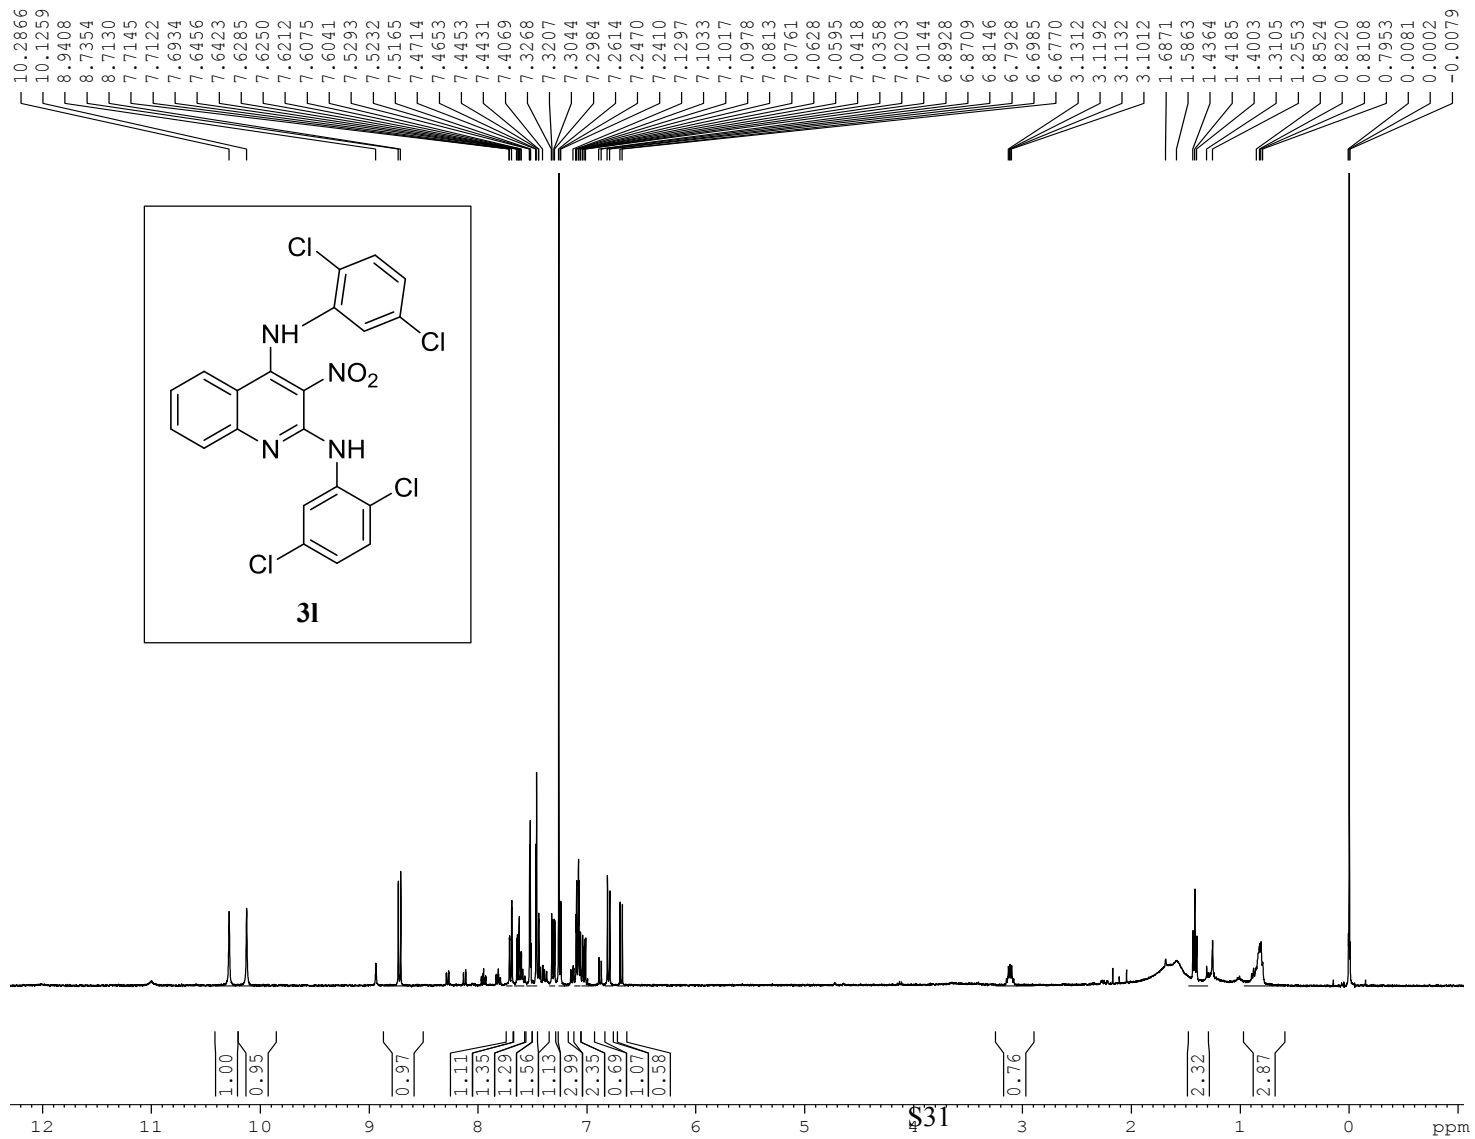

# <sup>1</sup>H NMR

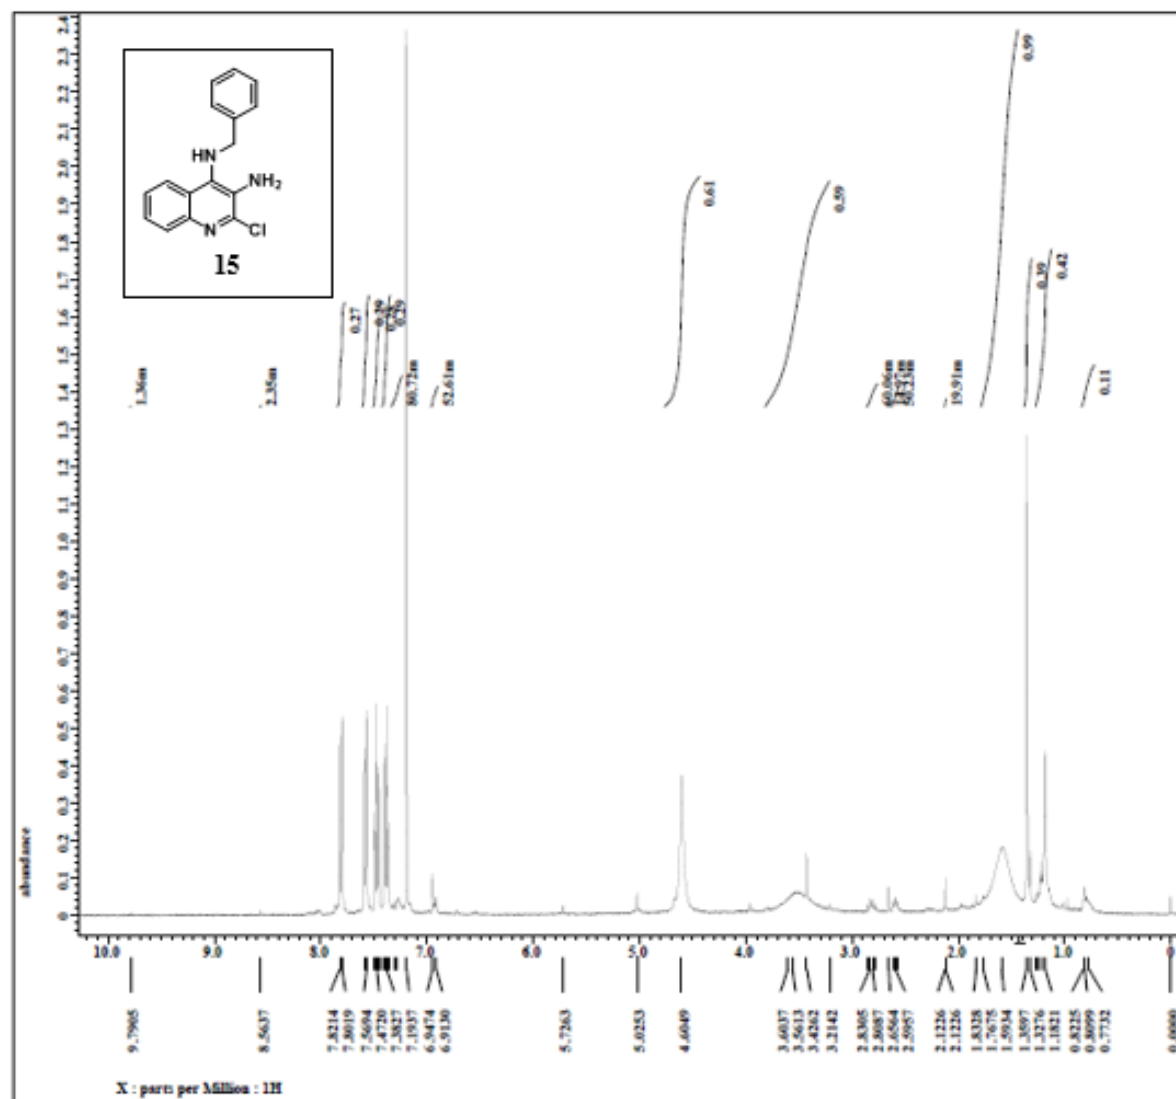



**<sup>1</sup>H NMR**

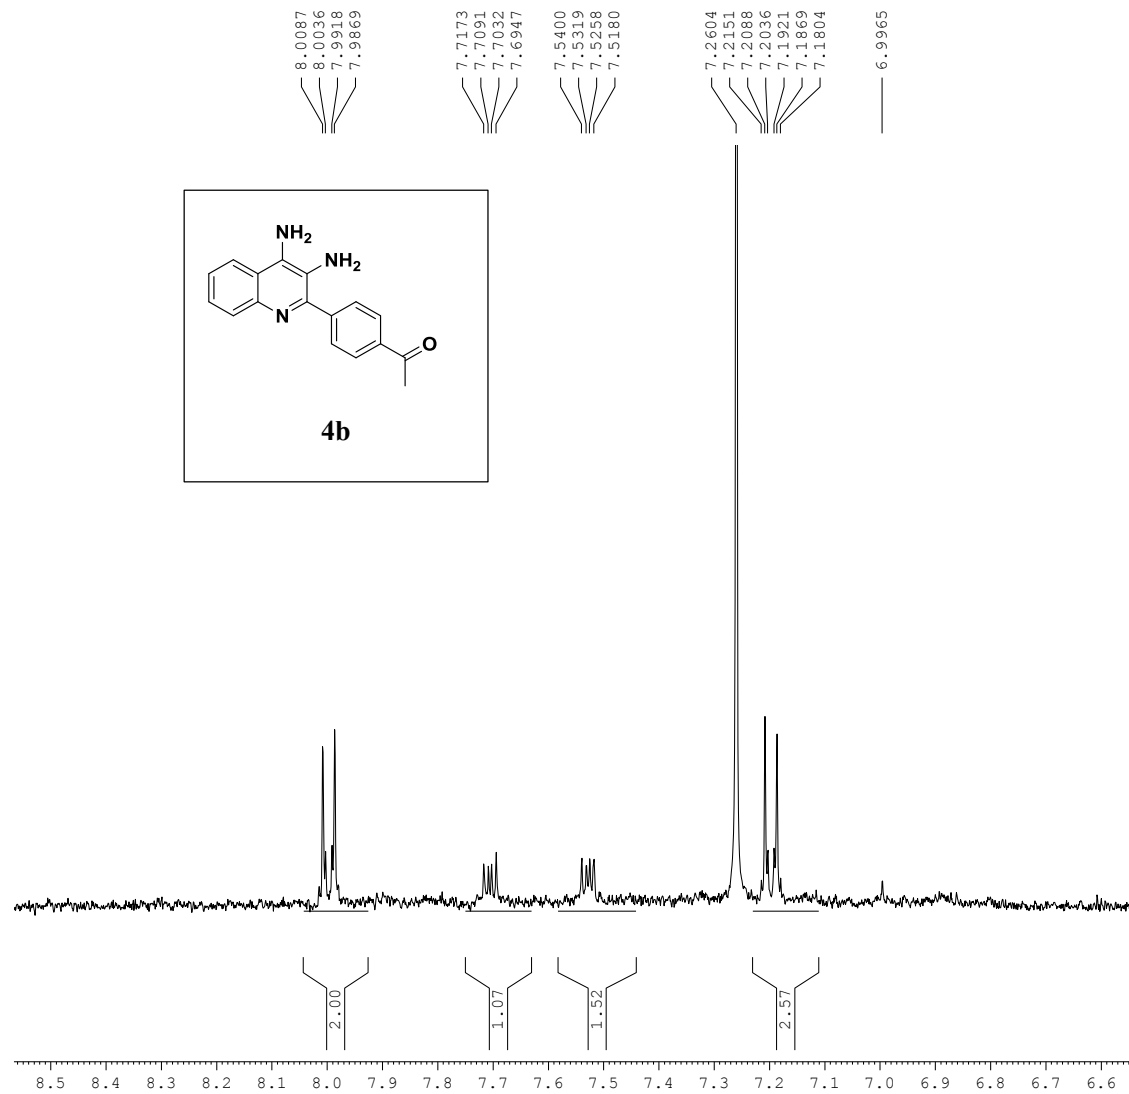

# <sup>1</sup>H NMR

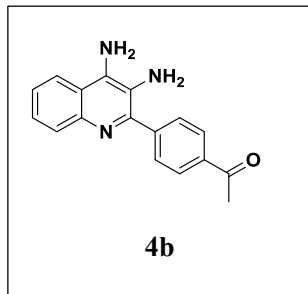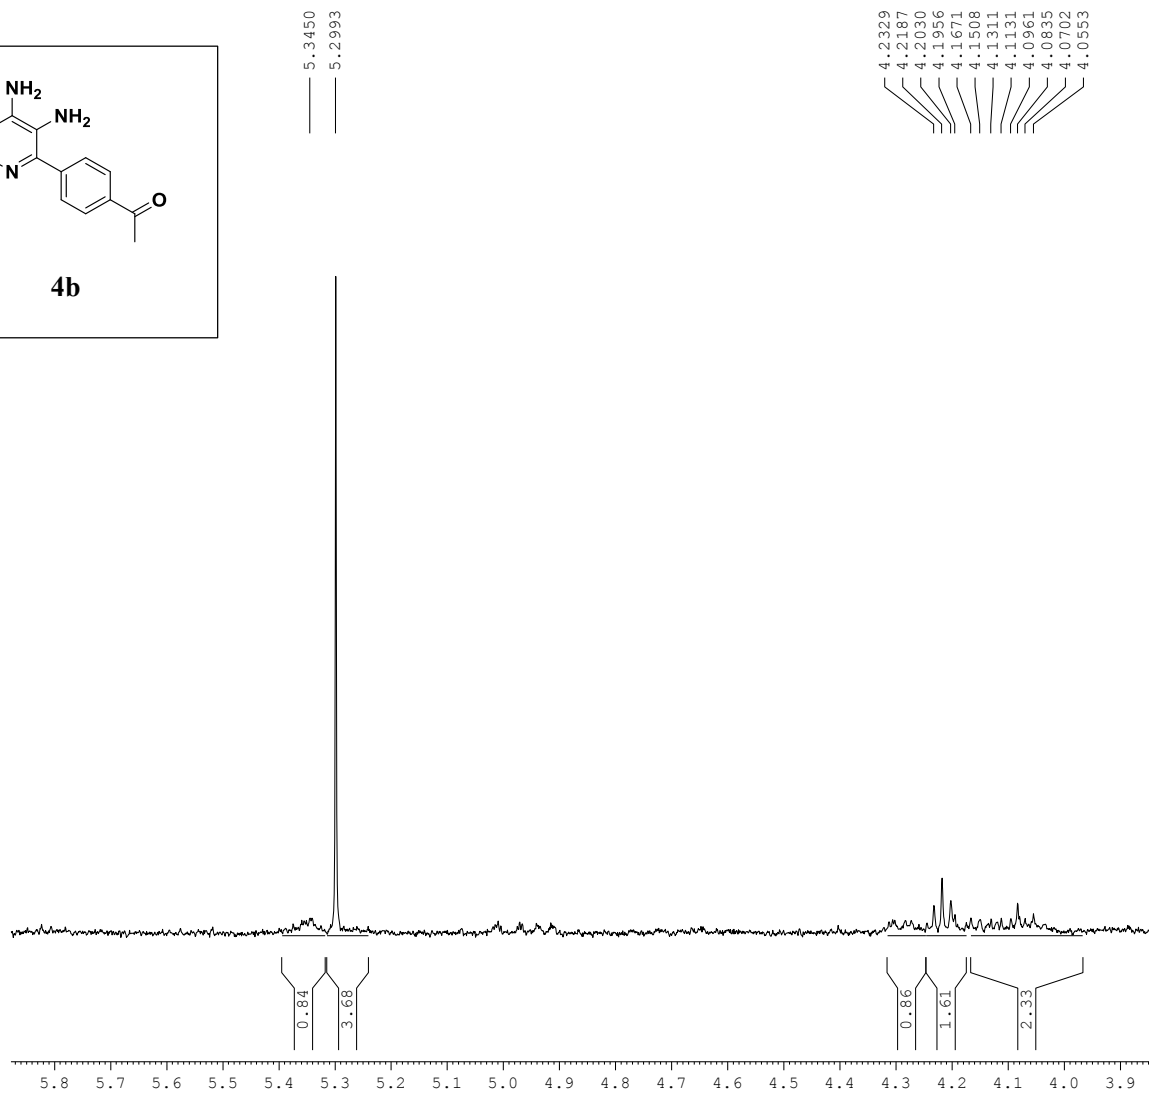

# HRMS

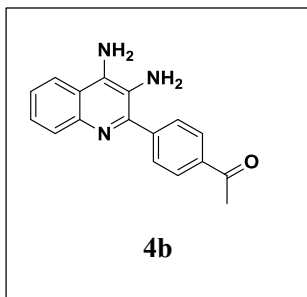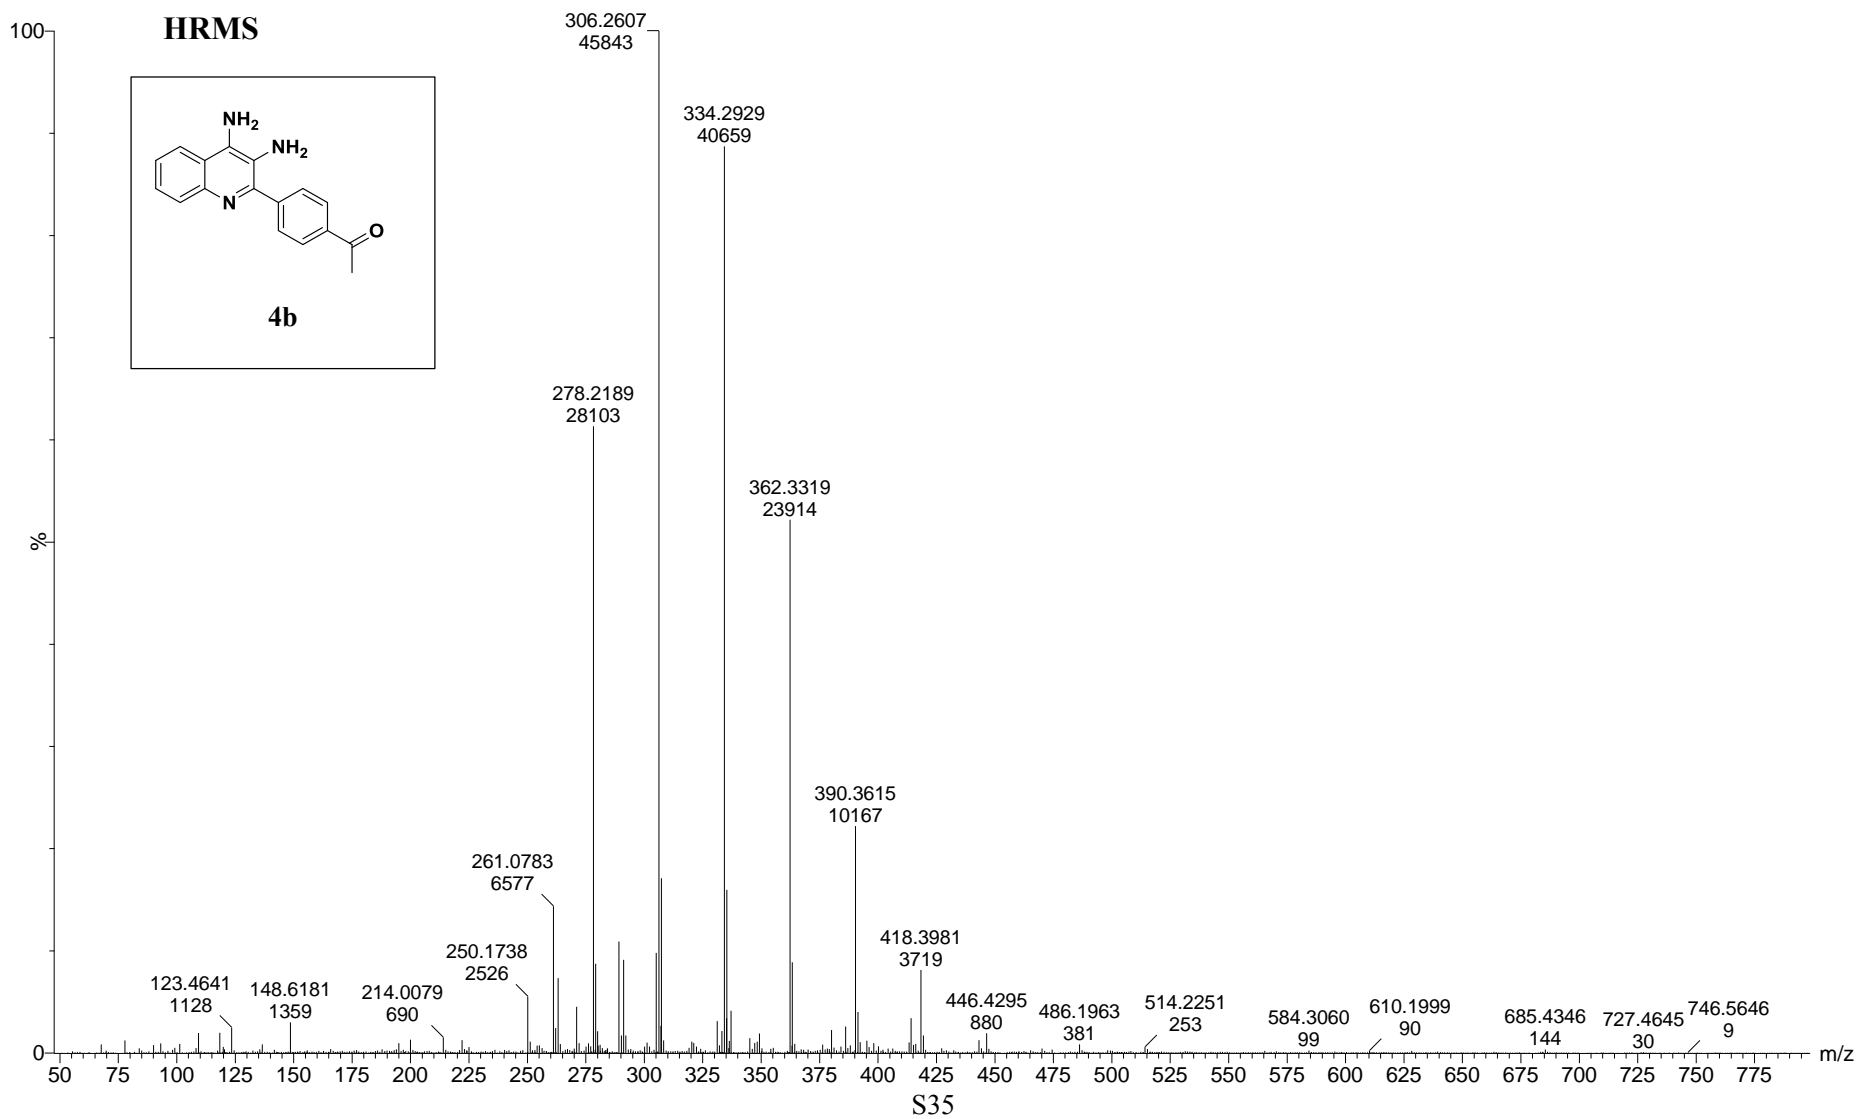

**<sup>1</sup>H NMR**

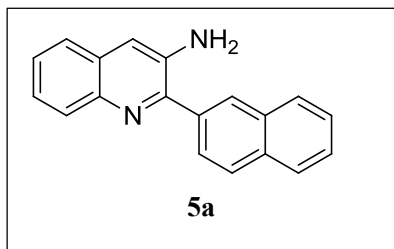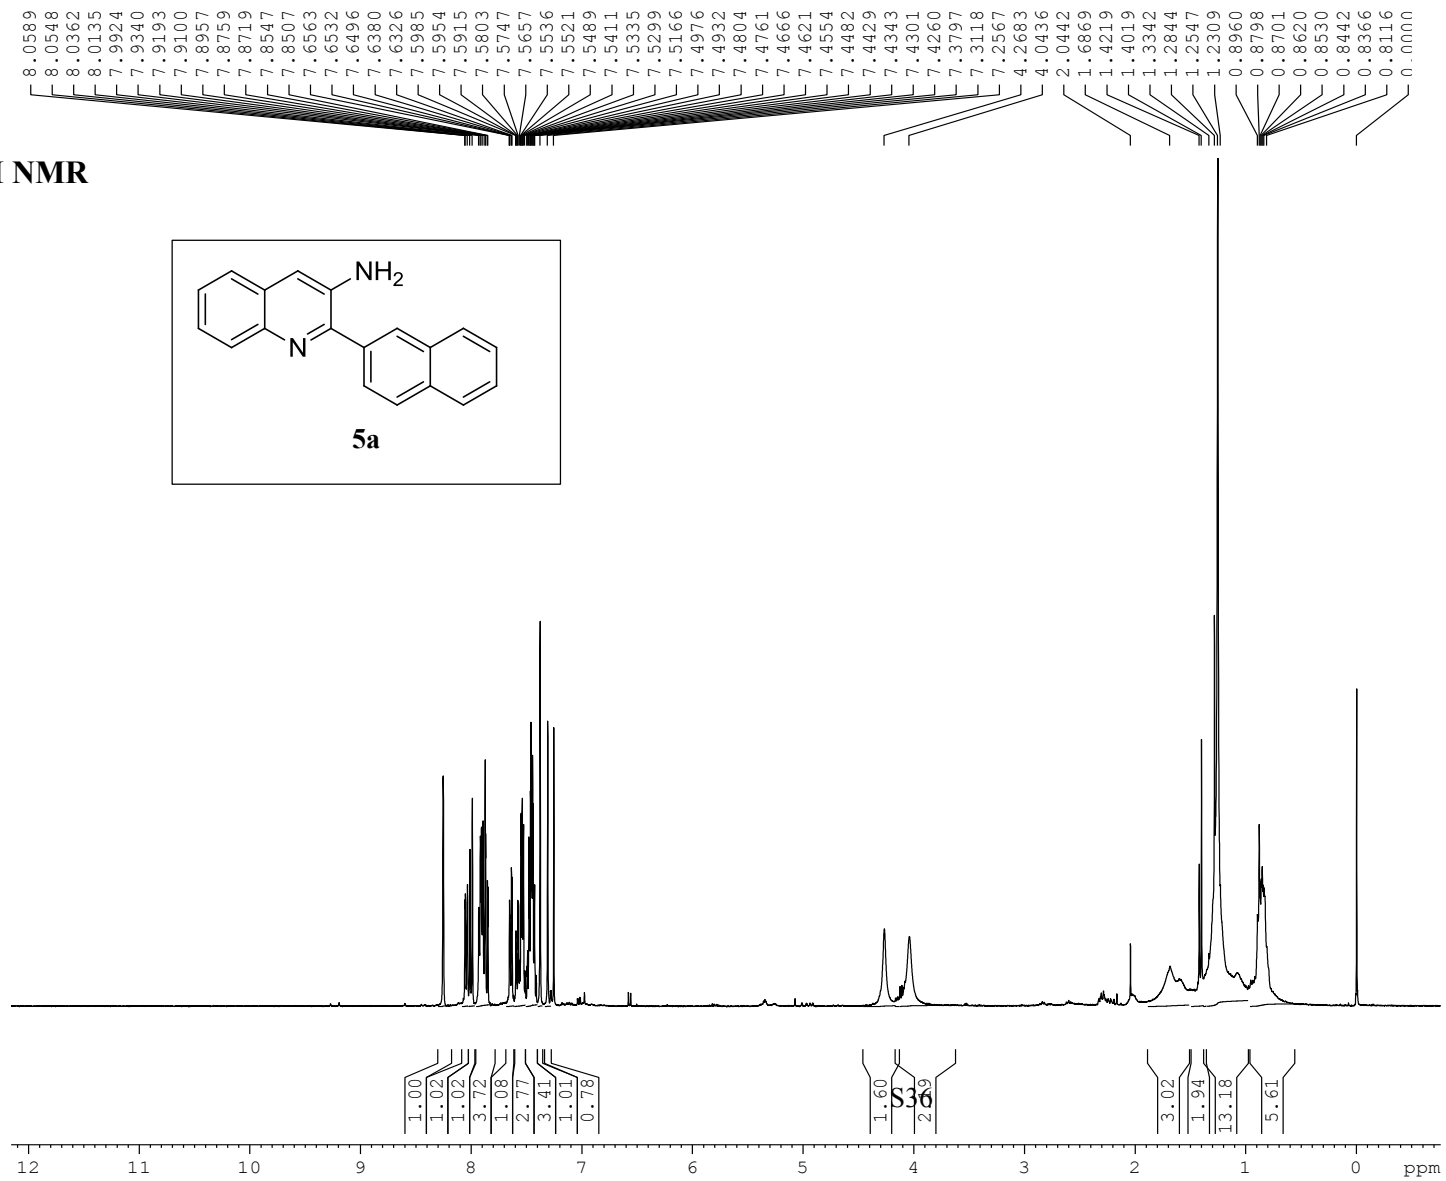

**<sup>13</sup>C NMR**

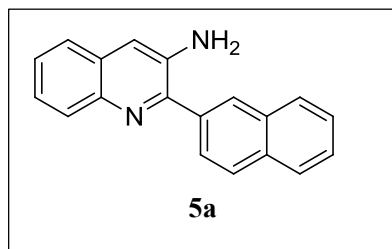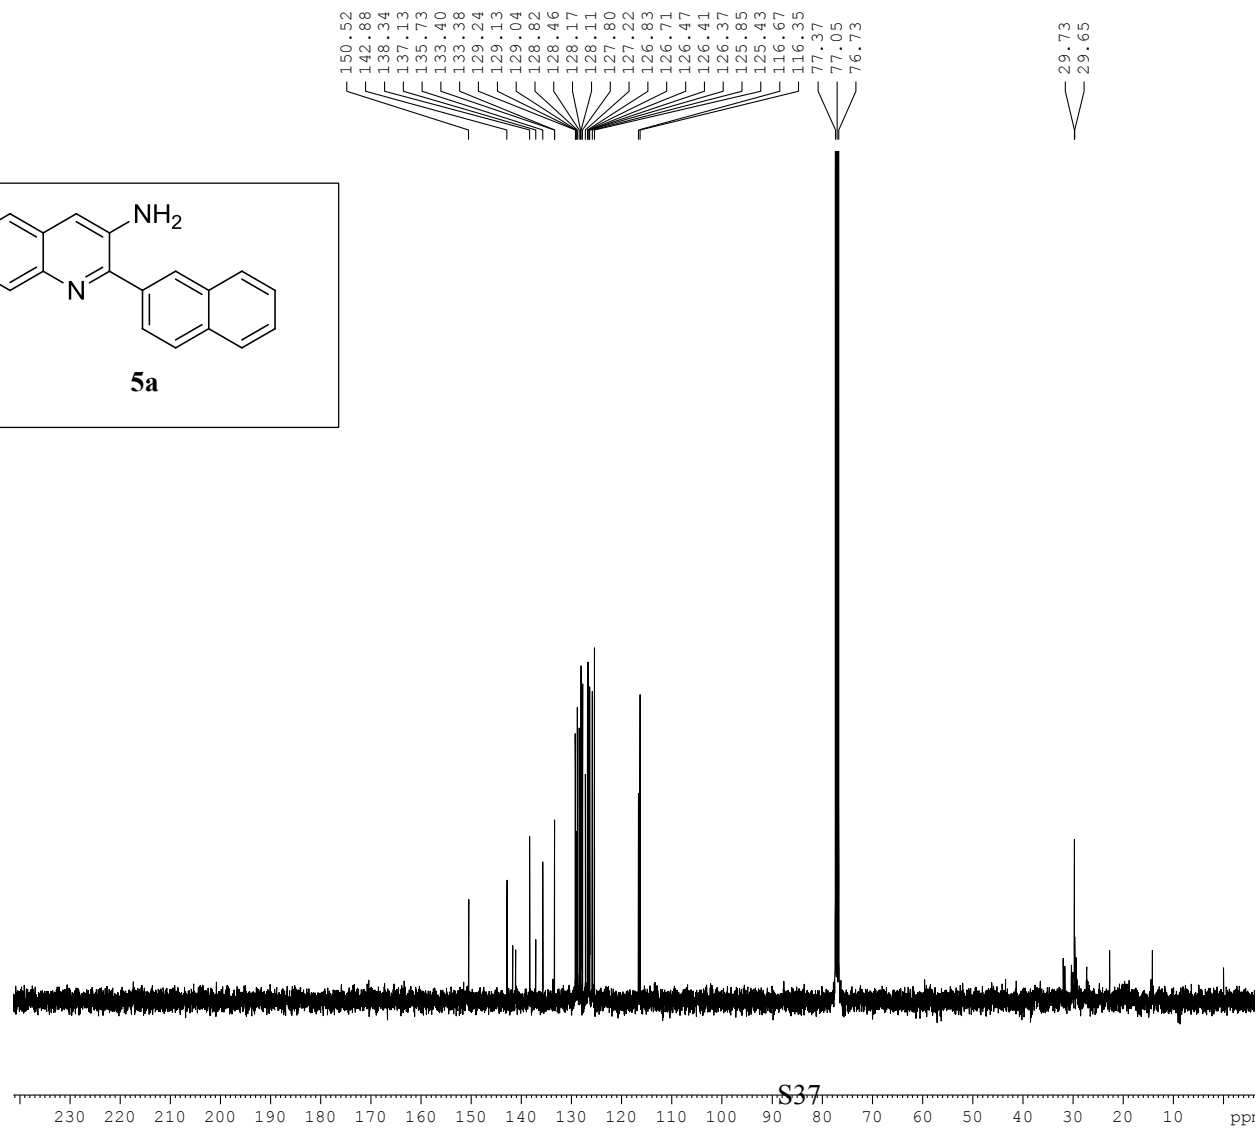

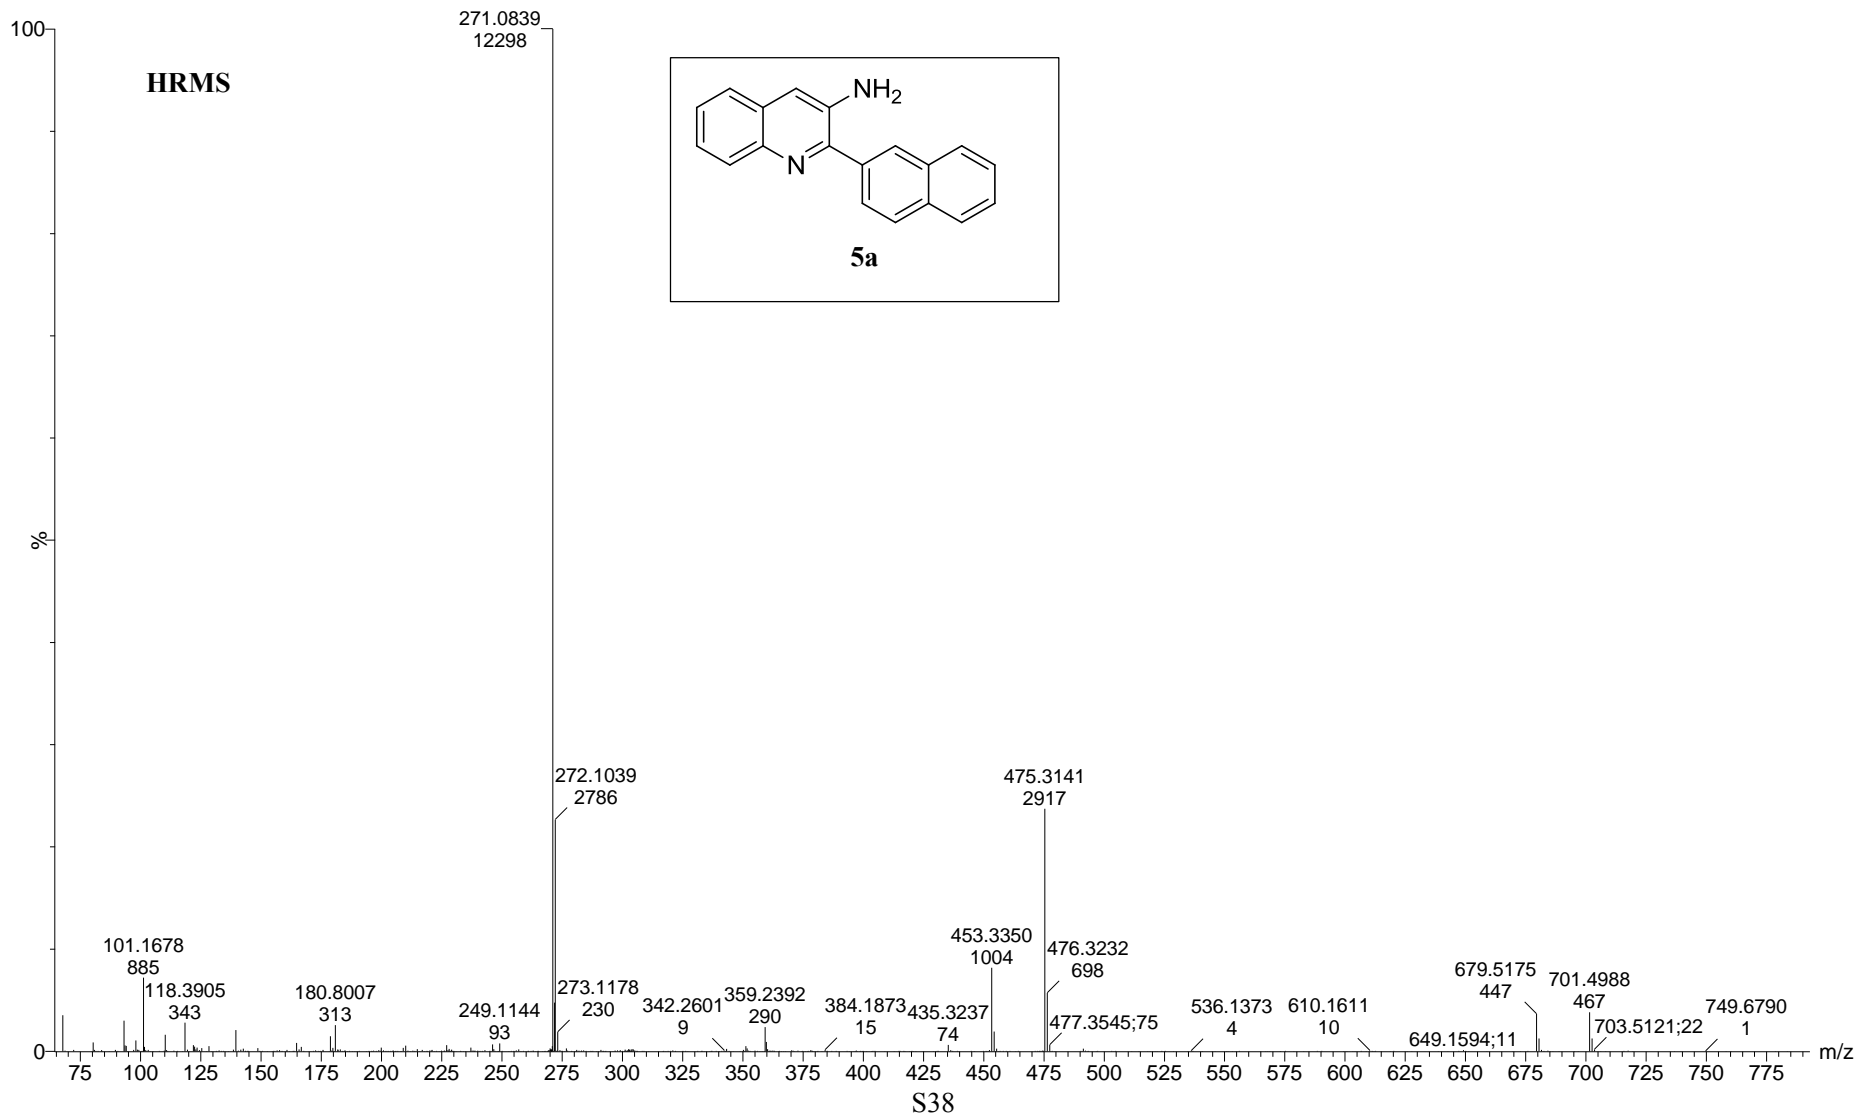

**<sup>1</sup>H NMR**

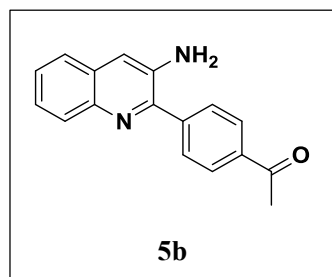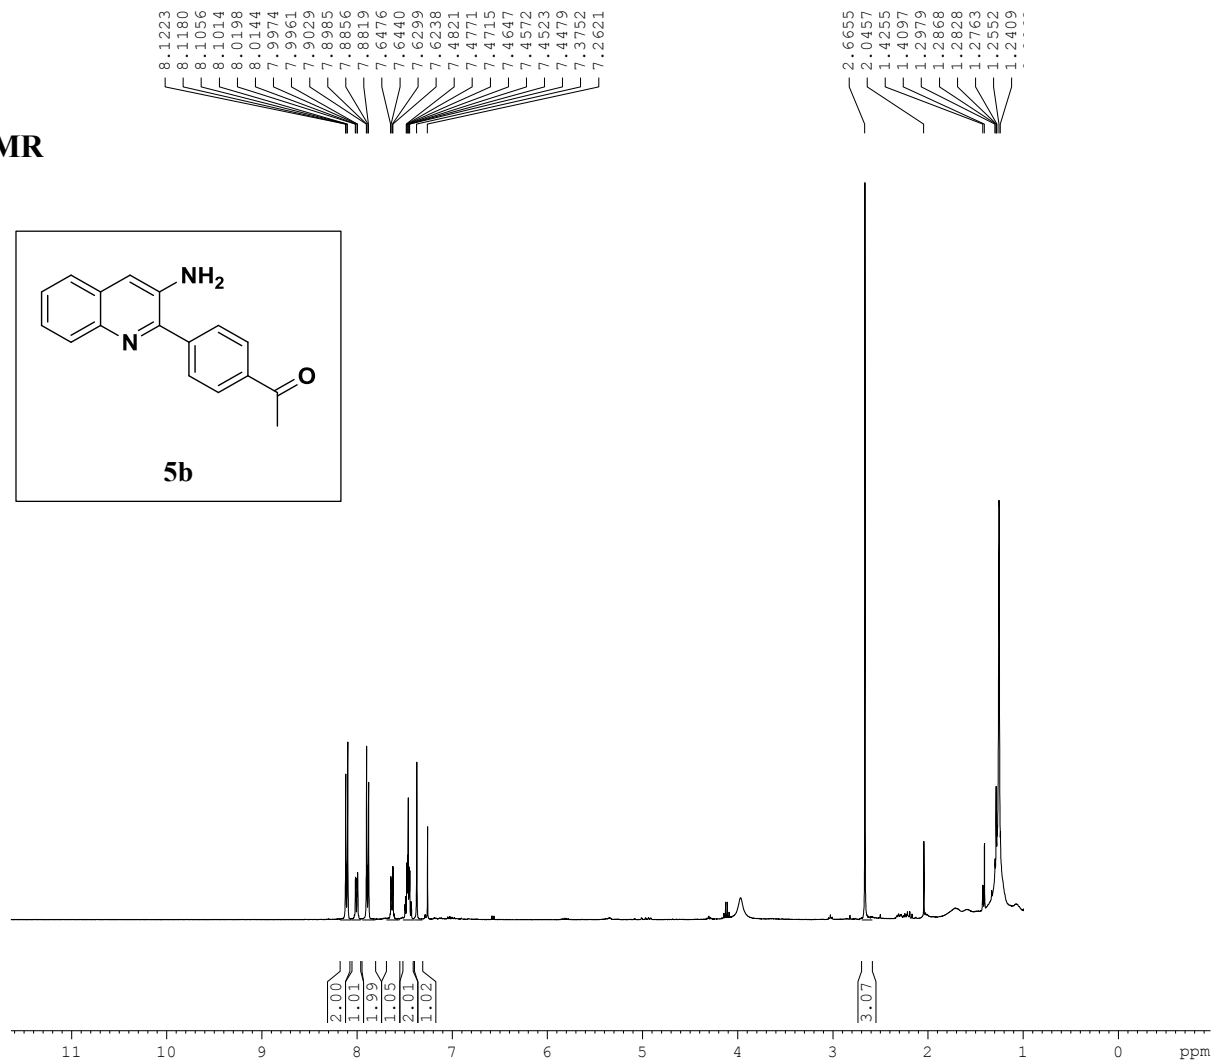

# <sup>1</sup>H NMR

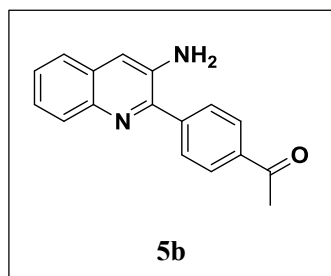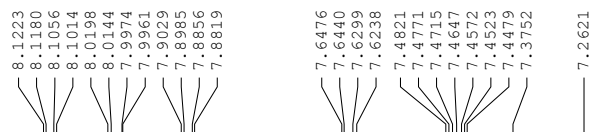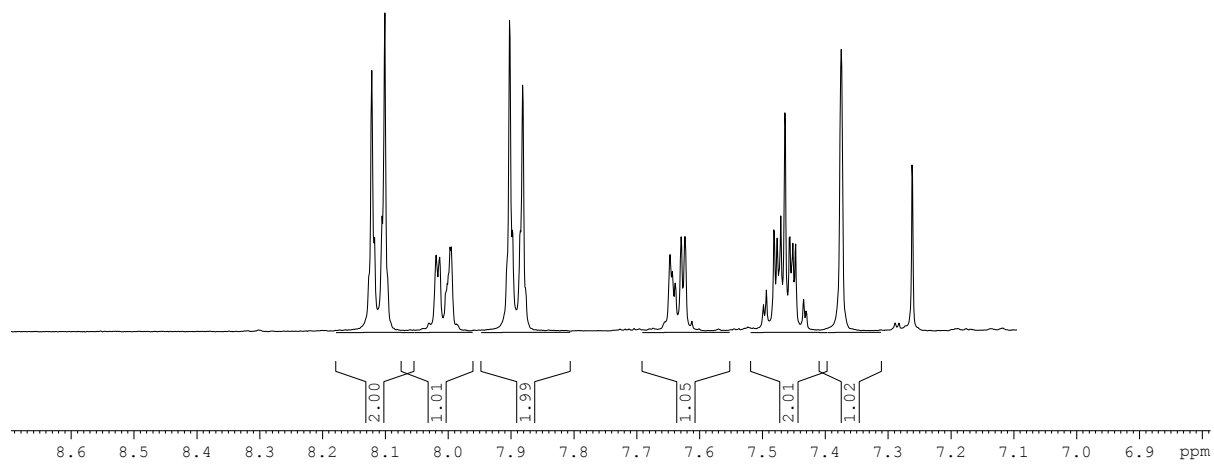



<sup>1</sup>H NMR

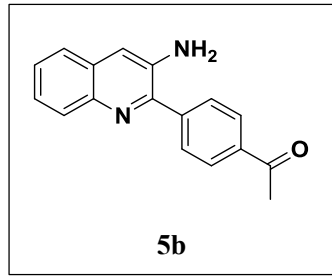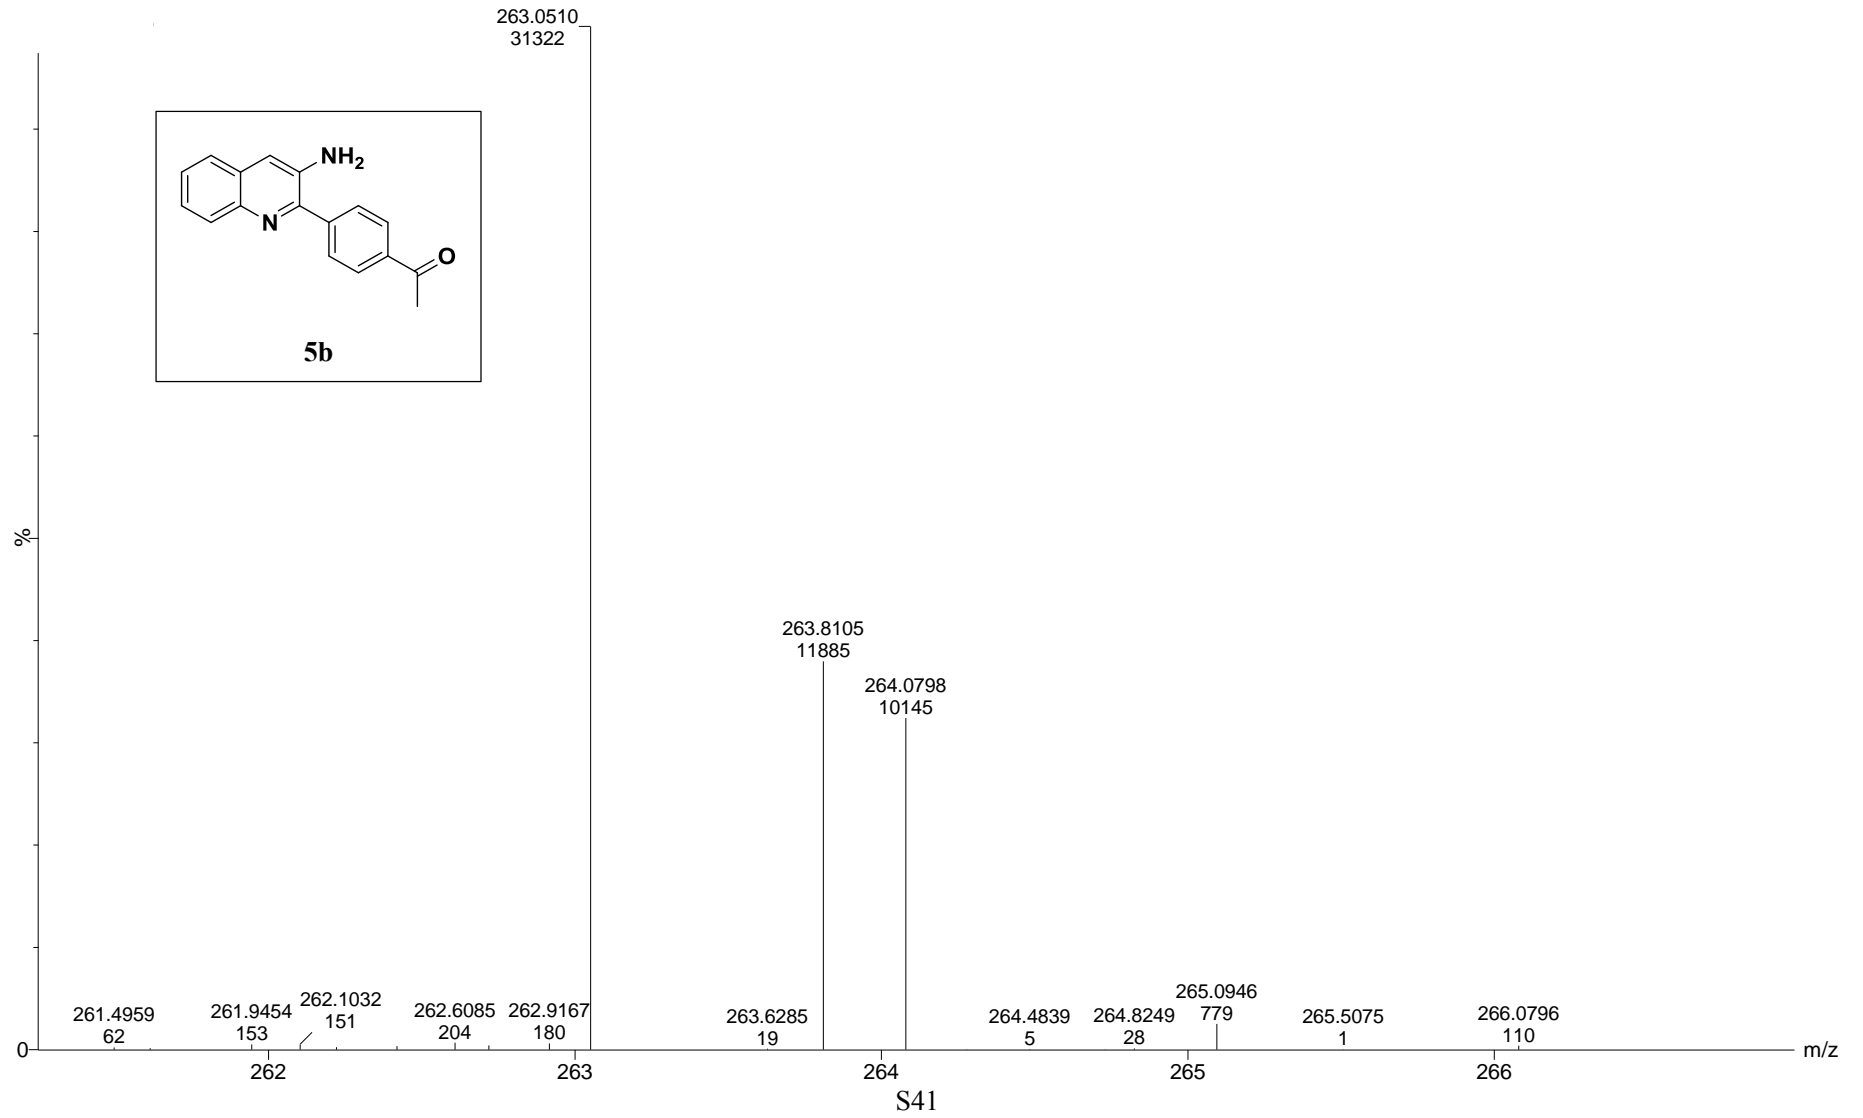

Supplement: c6ra15118c1.pdf [file c6ra15118c1.pdf]
